# Supplementary material
Source: PubMed Central journal article supplement (PMC7042942)
Supplement: jamapediatr-174-341-s001.pdf [file jamapediatr-174-341-s001.pdf]

## Supplementary Online Content

Locher C, Kossowsky J, Koechlin H, et al. Efficacy, safety and acceptability of pharmacologic treatments for pediatric migraine prophylaxis: a systematic review and network meta-analysis. *JAMA Pediatr*. Published online February 10, 2020. doi:10.1001/jamapediatrics.2019.5856

**eAppendix 1.** Search Terms

**eAppendix 2.** GRADE Ratings for each network

**eAppendix 3.** Details on Inconsistency

**eAppendix 4.** Details on Publication Bias

**eAppendix 5.** Details on Prediction Intervals

**eAppendix 6.** Long-term analysis

**eFigure 1.** Flow Chart

**eFigure 2.** Funnel plot with accompanying Egger test: Efficacy

**eFigure 3.** Funnel plot with accompanying Egger test: Acceptability

**eFigure 4.** Funnel plot with accompanying Egger test: Safety

**eFigure 5.** Forest plot of long-term efficacy

**eFigure 6.** Forest plot of long-term acceptability

**eFigure 7.** Forest plot of long-term safety

**eTable 1.** Demographics and study characteristics

**eTable 2.** Head-to-head comparisons of efficacy, acceptability, and safety

**eTable 3.** Head-to-head comparisons of long-term efficacy, acceptability, and safety

**eReferences.**

## eAppendix 1. Search Terms

Medline Search Strategy (Adapted for other databases)

| # ▲ | Searches                                                                                             |
|-----|------------------------------------------------------------------------------------------------------|
| 1   | randomi* controlled trial.pt.                                                                        |
| 2   | placebo.ab.                                                                                          |
| 3   | drug therapy.fs.                                                                                     |
| 4   | random*.ab.                                                                                          |
| 5   | trial.ab.                                                                                            |
| 6   | groups.ab.                                                                                           |
| 7   | 1 or 2 or 3 or 4 or 5 or 6                                                                           |
| 8   | exp animals/ not humans.sh.                                                                          |
| 9   | 7 not 8                                                                                              |
| 10  | exp migraine disorders/dh, dt, pc, su, th                                                            |
| 11  | migrain*.mp.                                                                                         |
| 12  | vascular headaches/dt, pc, su, th                                                                    |
| 13  | (vascular adj3 headache*).mp.                                                                        |
| 14  | 10 or 11 or 12 or 13                                                                                 |
| 15  | exp adolescent/ or exp child/ or exp infant/                                                         |
| 16  | (child* or adolescen* or infant* or juvenile* or pediatric* or paediatric* or developmental age).mp. |
| 17  | 15 or 16                                                                                             |
| 18  | 9 and 14 and 17                                                                                      |

## eAppendix 2. GRADE Ratings for each network

Using the Grading of Recommendations Assessment, Development, and Evaluation ratings (GRADE)<sup>3</sup> as well as the recently developed web application to apply this framework<sup>4</sup>, we estimated the certainty of evidence for each network estimate according to the following criteria:

**Study limitations (Within study bias):** We categorized the overall risk of bias of each study. According to the Cochrane Risk of Bias tool<sup>5</sup>, we rated five risk of bias items (i.e., allocation sequence concealment, adequate blinding, incomplete outcome data, selective outcome reporting, and other potential threats to validity). We calculated the average risk of bias by building the mean of all risk of bias items. For example: a study would be judged as *medium* risk of bias [some concerns] when the individual items would be once *high risk* [major concerns], three times *low risk* [no concerns], and twice *medium OR unclear risk* [some concerns]. We then used the contribution matrix to calculate the percentage of contribution from each study, and finally assessed the study limitation for each network estimate based on the weighted average risk of bias of the contributing studies. We selected the rule “Average Risk of Bias” in order to calculate the within study bias.

**Publication bias (Across studies bias):** Since there is so far a lack of a concrete methodology of assessing across-studies bias (publication bias) in NMA, a comparison-adjusted funnel plot with accompanying Egger test for asymmetry was conducted.

**Indirectness:** We judged that there was no concern in this domain as the included studies matched our inclusion criteria and study questions.

**Imprecision:** In line with previous analyses<sup>6</sup>, we considered a clinically meaningful threshold for standardized mean difference (SMD) to be 0.20.

**Heterogeneity:** We evaluated the degree of concerns through comparing the clinical inference based on the 95% confidence intervals (CI) and that based on the 95% prediction interval (PI), the latter reflecting the degree of heterogeneity. Applying the same clinical inference framework as for imprecision, we saw no concerns in heterogeneity when the two judgements matched (e.g. no concern based on 95% CI and no concern based on 95% PI), some concerns when they differed by one degree (e.g. no concern based on 95% CI but some concerns based on 95% PI), and major concerns when they differed by two degrees (e.g. no concern based on 95% CI but major concerns based on 95% PI).

**Incoherence (Inconsistency):** For inconsistency, we looked at the results of side splitting and we saw major concerns when  $p < 0.05$  but no concern otherwise.

## Efficacy

We found some concerns for *within-study bias* (i.e., study limitations) for several pair-wise comparisons. In terms of the *across-study bias* (i.e., publication bias), the Egger test for funnel plot asymmetry was non-significant ( $p=0.93$ ) indicating that selection bias is not a big threat to the network meta-analysis. There was no concern for *indirectness*, since the included studies all matched our study questions. Evaluating *imprecision*, we found that the two statistically significant comparisons (i.e., propranolol vs placebo; topiramate vs. placebo) revealed a clinically significant effect size. Furthermore, we examine *heterogeneity*, which is represented by the 95% prediction interval for each individual comparison. For both, propranolol vs. placebo and topiramate vs. placebo, the 95% prediction interval was non-significant. Furthermore, we found evidence for substantial and statistically significant heterogeneity in the network (within design  $Q=26.13$ ,  $p<.001$ ,  $\tau^2=0.18$ ;  $I^2=75.1\%$ ). Finally, there was no evidence of *inconsistency* between the direct and indirect evidence, i.e., all p-values were above 5%. Also, we identified no evidence of inconsistency in the NMA when calculating the global design-by-treatment interaction test (between designs  $Q=2.08$ ,  $p=.556$ ).

| Comparison                                | Number of Studies | Within-study bias | Across-studies bias | Indirectness | Imprecision    | Heterogeneity  | Incoherence | Confidence rating |
|-------------------------------------------|-------------------|-------------------|---------------------|--------------|----------------|----------------|-------------|-------------------|
| Mixed evidence                            |                   |                   |                     |              |                |                |             |                   |
| Butterbur root extract vs Placebo         | 1                 | Some concerns     | --                  | No concerns  | Major concerns | No concerns    | No concerns | Low               |
| Cinnarizine vs Placebo                    | 1                 | No concerns       | --                  | No concerns  | Major concerns | No concerns    | No concerns | Moderate          |
| Cinnarizine vs Propranolol                | 1                 | Some concerns     | --                  | No concerns  | Major concerns | No concerns    | No concerns | Low               |
| CoEnzyme Q10 vs Placebo                   | 1                 | Some concerns     | --                  | No concerns  | Major concerns | No concerns    | No concerns | Low               |
| Flunarizine vs Placebo                    | 1                 | Some concerns     | --                  | No concerns  | Some concerns  | Some concerns  | No concerns | Low               |
| L-5-Hydroxytryptophan (L-5HTP) vs Placebo | 1                 | Some concerns     | --                  | No concerns  | Major concerns | No concerns    | No concerns | Low               |
| Nimodipine vs Placebo                     | 1                 | Some concerns     | --                  | No concerns  | Major concerns | No concerns    | No concerns | Low               |
| Placebo vs Propranolol                    | 1                 | Some concerns     | --                  | No concerns  | No concerns    | Major concerns | No concerns | Low               |
| Placebo vs Riboflavin                     | 3                 | No concerns       | --                  | No concerns  | Major concerns | No concerns    | No concerns | Moderate          |
| Placebo vs Sodium Valproate               | 1                 | No concerns       | --                  | No concerns  | Major concerns | No concerns    | No concerns | Moderate          |
| Placebo vs Topiramate                     | 2                 | Some concerns     | --                  | No concerns  | No concerns    | Major concerns | No concerns | Low               |
| Pregabalin vs Propranolol                 | 1                 | Some concerns     | --                  | No concerns  | Major concerns | No concerns    | No concerns | Low               |
| Propranolol vs Sodium Valproate           | 2                 | Some concerns     | --                  | No concerns  | Some concerns  | Some concerns  | No concerns | Low               |
| Propranolol vs Topiramate                 | 2                 | Some concerns     | --                  | No concerns  | Major concerns | No concerns    | No concerns | Low               |

| Indirect evidence                                        |    |               |    |             |                |             |             |          |
|----------------------------------------------------------|----|---------------|----|-------------|----------------|-------------|-------------|----------|
| Butterbur root extract vs Cinnarizine                    | -- | Some concerns | -- | No concerns | Major concerns | No concerns | No concerns | Low      |
| Butterbur root extract vs CoEnzyme Q10                   | -- | Some concerns | -- | No concerns | Major concerns | No concerns | No concerns | Low      |
| Butterbur root extract vs Flunarizine                    | -- | Some concerns | -- | No concerns | Major concerns | No concerns | No concerns | Low      |
| Butterbur root extract vs L-5-Hydroxytryptophan (L-5HTP) | -- | Some concerns | -- | No concerns | Major concerns | No concerns | No concerns | Low      |
| Butterbur root extract vs Nimodipine                     | -- | Some concerns | -- | No concerns | Major concerns | No concerns | No concerns | Low      |
| Butterbur root extract vs Pregabalin                     | -- | Some concerns | -- | No concerns | Major concerns | No concerns | No concerns | Low      |
| Butterbur root extract vs Propranolol                    | -- | Some concerns | -- | No concerns | Major concerns | No concerns | No concerns | Low      |
| Butterbur root extract vs Riboflavin                     | -- | No concerns   | -- | No concerns | Major concerns | No concerns | No concerns | Moderate |
| Butterbur root extract vs Sodium Valproate               | -- | Some concerns | -- | No concerns | Major concerns | No concerns | No concerns | Low      |
| Butterbur root extract vs Topiramate                     | -- | Some concerns | -- | No concerns | Major concerns | No concerns | No concerns | Low      |
| Cinnarizine vs CoEnzyme Q10                              | -- | Some concerns | -- | No concerns | Major concerns | No concerns | No concerns | Low      |
| Cinnarizine vs Flunarizine                               | -- | Some concerns | -- | No concerns | Major concerns | No concerns | No concerns | Low      |
| Cinnarizine vs L-5-Hydroxytryptophan (L-5HTP)            | -- | Some concerns | -- | No concerns | Major concerns | No concerns | No concerns | Low      |
| Cinnarizine vs Nimodipine                                | -- | Some concerns | -- | No concerns | Major concerns | No concerns | No concerns | Low      |
| Cinnarizine vs Pregabalin                                | -- | Some concerns | -- | No concerns | Major concerns | No concerns | No concerns | Low      |
| Cinnarizine vs Riboflavin                                | -- | No concerns   | -- | No concerns | Major concerns | No concerns | No concerns | Moderate |
| Cinnarizine vs Sodium Valproate                          | -- | Some concerns | -- | No concerns | Major concerns | No concerns | No concerns | Low      |
| Cinnarizine vs Topiramate                                | -- | Some concerns | -- | No concerns | Major concerns | No concerns | No concerns | Low      |
| CoEnzyme Q10 vs Flunarizine                              | -- | Some concerns | -- | No concerns | Major concerns | No concerns | No concerns | Low      |
| CoEnzyme Q10 vs L-5-Hydroxytryptophan (L-5HTP)           | -- | Some concerns | -- | No concerns | Major concerns | No concerns | No concerns | Low      |

|                                                    |    |               |    |             |                |             |             |          |
|----------------------------------------------------|----|---------------|----|-------------|----------------|-------------|-------------|----------|
| CoEnzyme Q10 vs Nimodipine                         | -- | Some concerns | -- | No concerns | Major concerns | No concerns | No concerns | Low      |
| CoEnzyme Q10 vs Pregabalin                         | -- | Some concerns | -- | No concerns | Major concerns | No concerns | No concerns | Low      |
| CoEnzyme Q10 vs Propranolol                        | -- | Some concerns | -- | No concerns | Major concerns | No concerns | No concerns | Low      |
| CoEnzyme Q10 vs Riboflavin                         | -- | No concerns   | -- | No concerns | Major concerns | No concerns | No concerns | Moderate |
| CoEnzyme Q10 vs Sodium Valproate                   | -- | Some concerns | -- | No concerns | Major concerns | No concerns | No concerns | Low      |
| CoEnzyme Q10 vs Topiramate                         | -- | Some concerns | -- | No concerns | Major concerns | No concerns | No concerns | Low      |
| Flunarizine vs L-5-Hydroxytryptophan (L-5HTP)      | -- | Some concerns | -- | No concerns | Major concerns | No concerns | No concerns | Low      |
| Flunarizine vs Nimodipine                          | -- | Some concerns | -- | No concerns | Major concerns | No concerns | No concerns | Low      |
| Flunarizine vs Pregabalin                          | -- | Some concerns | -- | No concerns | Major concerns | No concerns | No concerns | Low      |
| Flunarizine vs Propranolol                         | -- | Some concerns | -- | No concerns | Major concerns | No concerns | No concerns | Low      |
| Flunarizine vs Riboflavin                          | -- | No concerns   | -- | No concerns | Major concerns | No concerns | No concerns | Moderate |
| Flunarizine vs Sodium Valproate                    | -- | Some concerns | -- | No concerns | Major concerns | No concerns | No concerns | Low      |
| Flunarizine vs Topiramate                          | -- | Some concerns | -- | No concerns | Major concerns | No concerns | No concerns | Low      |
| L-5-Hydroxytryptophan (L-5HTP) vs Nimodipine       | -- | Some concerns | -- | No concerns | Major concerns | No concerns | No concerns | Low      |
| L-5-Hydroxytryptophan (L-5HTP) vs Pregabalin       | -- | Some concerns | -- | No concerns | Major concerns | No concerns | No concerns | Low      |
| L-5-Hydroxytryptophan (L-5HTP) vs Propranolol      | -- | Some concerns | -- | No concerns | Major concerns | No concerns | No concerns | Low      |
| L-5-Hydroxytryptophan (L-5HTP) vs Riboflavin       | -- | No concerns   | -- | No concerns | Major concerns | No concerns | No concerns | Moderate |
| L-5-Hydroxytryptophan (L-5HTP) vs Sodium Valproate | -- | Some concerns | -- | No concerns | Major concerns | No concerns | No concerns | Low      |
| L-5-Hydroxytryptophan (L-5HTP) vs Topiramate       | -- | Some concerns | -- | No concerns | Major concerns | No concerns | No concerns | Low      |
| Nimodipine vs Pregabalin                           | -- | Some concerns | -- | No concerns | Major concerns | No concerns | No concerns | Low      |
| Nimodipine vs Propranolol                          | -- | Some concerns | -- | No concerns | Major concerns | No concerns | No concerns | Low      |

|                                |    |               |    |             |                |             |             |          |
|--------------------------------|----|---------------|----|-------------|----------------|-------------|-------------|----------|
| Nimodipine vs Riboflavin       | -- | No concerns   | -- | No concerns | Major concerns | No concerns | No concerns | Moderate |
| Nimodipine vs Sodium Valproate | -- | Some concerns | -- | No concerns | Major concerns | No concerns | No concerns | Low      |
| Nimodipine vs Topiramate       | -- | Some concerns | -- | No concerns | Major concerns | No concerns | No concerns | Low      |
| Placebo vs Pregabalin          | -- | Some concerns | -- | No concerns | Major concerns | No concerns | No concerns | Low      |
| Pregabalin vs Riboflavin       | -- | Some concerns | -- | No concerns | Major concerns | No concerns | No concerns | Low      |
| Pregabalin vs Sodium Valproate | -- | Some concerns | -- | No concerns | Major concerns | No concerns | No concerns | Low      |
| Pregabalin vs Topiramate       | -- | Some concerns | -- | No concerns | Major concerns | No concerns | No concerns | Low      |
| Propranolol vs Riboflavin      | -- | No concerns   | -- | No concerns | Major concerns | No concerns | No concerns | Moderate |
| Riboflavin vs Sodium Valproate | -- | No concerns   | -- | No concerns | Major concerns | No concerns | No concerns | Moderate |
| Riboflavin vs Topiramate       | -- | No concerns   | -- | No concerns | Major concerns | No concerns | No concerns | Moderate |
| Sodium Valproate vs Topiramate | -- | Some concerns | -- | No concerns | Major concerns | No concerns | No concerns | Low      |

## Acceptability

We did not find evidence for heterogeneity (within design  $Q=1.99$ ,  $p=.851$ ,  $\tau^2=0.00$ ;  $I^2=0\%$ ). There was no evidence of inconsistency between the direct and indirect evidence, i.e., all p-values were above 5%. Also, we found no evidence of inconsistency in the NMA when calculating the global design-by-treatment interaction test (between designs  $Q=3.14$ ,  $p=.208$ ).

| Comparison                        | Number of Studies | Within-study bias | Across-studies bias | Indirectness | Imprecision    | Heterogeneity | Incoherence | Confidence rating |
|-----------------------------------|-------------------|-------------------|---------------------|--------------|----------------|---------------|-------------|-------------------|
| Mixed evidence                    |                   |                   |                     |              |                |               |             |                   |
| Amitriptylin vs Melatonin         | 1                 | No concerns       | --                  | No concerns  | Major concerns | No concerns   | No concerns | Moderate          |
| Butterbur root extract vs Placebo | 1                 | Some concerns     | --                  | No concerns  | Major concerns | No concerns   | No concerns | Low               |
| Cinnarizine vs Placebo            | 1                 | No concerns       | --                  | No concerns  | Major concerns | No concerns   | No concerns | Moderate          |
| Cinnarizine vs Propranolol        | 1                 | Some concerns     | --                  | No concerns  | Major concerns | No concerns   | No concerns | Low               |
| CoEnzyme Q10 vs Placebo           | 1                 | Some concerns     | --                  | No concerns  | Major concerns | No concerns   | No concerns | Low               |
| Flunarizine vs Placebo            | 1                 | Some concerns     | --                  | No concerns  | Major concerns | No concerns   | No concerns | Low               |
| Melatonin vs Placebo              | 1                 | No concerns       | --                  | No concerns  | Major concerns | No concerns   | No concerns | Moderate          |
| Nimodipine vs Placebo             | 1                 | Some concerns     | --                  | No concerns  | Major concerns | No concerns   | No concerns | Low               |
| Placebo vs Riboflavin             | 3                 | No concerns       | --                  | No concerns  | Major concerns | No concerns   | No concerns | Moderate          |
| Placebo vs Sodium Valproate       | 1                 | No concerns       | --                  | No concerns  | Major concerns | No concerns   | No concerns | Moderate          |
| Placebo vs Topiramate             | 2                 | Some concerns     | --                  | No concerns  | Major concerns | No concerns   | No concerns | Low               |
| Pregabalin vs Propranolol         | 1                 | Some concerns     | --                  | No concerns  | Major concerns | No concerns   | No concerns | Low               |
| Propranolol vs Sodium Valproate   | 2                 | Some concerns     | --                  | No concerns  | Major concerns | No concerns   | No concerns | Low               |
| Propranolol vs Topiramate         | 2                 | Some concerns     | --                  | No concerns  | Major concerns | No concerns   | No concerns | Low               |



Indirect evidence

|                                            |    |               |    |             |                |             |             |          |
|--------------------------------------------|----|---------------|----|-------------|----------------|-------------|-------------|----------|
| Amitriptylin vs Butterbur root extract     | -- | No concerns   | -- | No concerns | Major concerns | No concerns | No concerns | Moderate |
| Amitriptylin vs Cinnarizine                | -- | No concerns   | -- | No concerns | Major concerns | No concerns | No concerns | Moderate |
| Amitriptylin vs CoEnzyme Q10               | -- | No concerns   | -- | No concerns | Major concerns | No concerns | No concerns | Moderate |
| Amitriptylin vs Flunarizine                | -- | No concerns   | -- | No concerns | Major concerns | No concerns | No concerns | Moderate |
| Amitriptylin vs Nimodipine                 | -- | No concerns   | -- | No concerns | Major concerns | No concerns | No concerns | Moderate |
| Amitriptylin vs Placebo                    | -- | No concerns   | -- | No concerns | Major concerns | No concerns | No concerns | Moderate |
| Amitriptylin vs Pregabalin                 | -- | No concerns   | -- | No concerns | Major concerns | No concerns | No concerns | Moderate |
| Amitriptylin vs Propranolol                | -- | No concerns   | -- | No concerns | Major concerns | No concerns | No concerns | Moderate |
| Amitriptylin vs Riboflavin                 | -- | No concerns   | -- | No concerns | Major concerns | No concerns | No concerns | Moderate |
| Amitriptylin vs Sodium Valproate           | -- | No concerns   | -- | No concerns | Major concerns | No concerns | No concerns | Moderate |
| Amitriptylin vs Topiramate                 | -- | No concerns   | -- | No concerns | Major concerns | No concerns | No concerns | Moderate |
| Butterbur root extract vs Cinnarizine      | -- | Some concerns | -- | No concerns | Major concerns | No concerns | No concerns | Low      |
| Butterbur root extract vs CoEnzyme Q10     | -- | Some concerns | -- | No concerns | Major concerns | No concerns | No concerns | Low      |
| Butterbur root extract vs Flunarizine      | -- | Some concerns | -- | No concerns | Major concerns | No concerns | No concerns | Low      |
| Butterbur root extract vs Melatonin        | -- | Some concerns | -- | No concerns | Major concerns | No concerns | No concerns | Low      |
| Butterbur root extract vs Nimodipine       | -- | Some concerns | -- | No concerns | Major concerns | No concerns | No concerns | Low      |
| Butterbur root extract vs Pregabalin       | -- | Some concerns | -- | No concerns | Major concerns | No concerns | No concerns | Low      |
| Butterbur root extract vs Propranolol      | -- | Some concerns | -- | No concerns | Major concerns | No concerns | No concerns | Low      |
| Butterbur root extract vs Riboflavin       | -- | Some concerns | -- | No concerns | Major concerns | No concerns | No concerns | Low      |
| Butterbur root extract vs Sodium Valproate | -- | Some concerns | -- | No concerns | Major concerns | No concerns | No concerns | Low      |

|                                      |    |               |    |             |                |             |             |          |
|--------------------------------------|----|---------------|----|-------------|----------------|-------------|-------------|----------|
| Butterbur root extract vs Topiramate | -- | Some concerns | -- | No concerns | Major concerns | No concerns | No concerns | Low      |
| Cinnarizine vs CoEnzyme Q10          | -- | Some concerns | -- | No concerns | Major concerns | No concerns | No concerns | Low      |
| Cinnarizine vs Flunarizine           | -- | Some concerns | -- | No concerns | Major concerns | No concerns | No concerns | Low      |
| Cinnarizine vs Melatonin             | -- | No concerns   | -- | No concerns | Major concerns | No concerns | No concerns | Moderate |
| Cinnarizine vs Nimodipine            | -- | Some concerns | -- | No concerns | Major concerns | No concerns | No concerns | Low      |
| Cinnarizine vs Pregabalin            | -- | Some concerns | -- | No concerns | Major concerns | No concerns | No concerns | Low      |
| Cinnarizine vs Riboflavin            | -- | No concerns   | -- | No concerns | Major concerns | No concerns | No concerns | Moderate |
| Cinnarizine vs Sodium Valproate      | -- | No concerns   | -- | No concerns | Major concerns | No concerns | No concerns | Moderate |
| Cinnarizine vs Topiramate            | -- | Some concerns | -- | No concerns | Major concerns | No concerns | No concerns | Low      |
| CoEnzyme Q10 vs Flunarizine          | -- | Some concerns | -- | No concerns | Major concerns | No concerns | No concerns | Low      |
| CoEnzyme Q10 vs Melatonin            | -- | Some concerns | -- | No concerns | Major concerns | No concerns | No concerns | Low      |
| CoEnzyme Q10 vs Nimodipine           | -- | Some concerns | -- | No concerns | Major concerns | No concerns | No concerns | Low      |
| CoEnzyme Q10 vs Pregabalin           | -- | Some concerns | -- | No concerns | Major concerns | No concerns | No concerns | Low      |
| CoEnzyme Q10 vs Propranolol          | -- | Some concerns | -- | No concerns | Major concerns | No concerns | No concerns | Low      |
| CoEnzyme Q10 vs Riboflavin           | -- | Some concerns | -- | No concerns | Major concerns | No concerns | No concerns | Low      |
| CoEnzyme Q10 vs Sodium Valproate     | -- | Some concerns | -- | No concerns | Major concerns | No concerns | No concerns | Low      |
| CoEnzyme Q10 vs Topiramate           | -- | Some concerns | -- | No concerns | Major concerns | No concerns | No concerns | Low      |
| Flunarizine vs Melatonin             | -- | Some concerns | -- | No concerns | Major concerns | No concerns | No concerns | Low      |
| Flunarizine vs Nimodipine            | -- | Some concerns | -- | No concerns | Major concerns | No concerns | No concerns | Low      |
| Flunarizine vs Pregabalin            | -- | Some concerns | -- | No concerns | Major concerns | No concerns | No concerns | Low      |

|                                 |    |               |    |             |                |             |             |          |
|---------------------------------|----|---------------|----|-------------|----------------|-------------|-------------|----------|
| Flunarizine vs Propranolol      | -- | Some concerns | -- | No concerns | Major concerns | No concerns | No concerns | Low      |
| Flunarizine vs Riboflavin       | -- | Some concerns | -- | No concerns | Major concerns | No concerns | No concerns | Low      |
| Flunarizine vs Sodium Valproate | -- | Some concerns | -- | No concerns | Major concerns | No concerns | No concerns | Low      |
| Flunarizine vs Topiramate       | -- | Some concerns | -- | No concerns | Major concerns | No concerns | No concerns | Low      |
| Melatonin vs Nimodipine         | -- | Some concerns | -- | No concerns | Major concerns | No concerns | No concerns | Low      |
| Melatonin vs Pregabalin         | -- | Some concerns | -- | No concerns | Major concerns | No concerns | No concerns | Low      |
| Melatonin vs Propranolol        | -- | No concerns   | -- | No concerns | Major concerns | No concerns | No concerns | Moderate |
| Melatonin vs Riboflavin         | -- | No concerns   | -- | No concerns | Major concerns | No concerns | No concerns | Moderate |
| Melatonin vs Sodium Valproate   | -- | No concerns   | -- | No concerns | Major concerns | No concerns | No concerns | Moderate |
| Melatonin vs Topiramate         | -- | No concerns   | -- | No concerns | Major concerns | No concerns | No concerns | Moderate |
| Nimodipine vs Pregabalin        | -- | Some concerns | -- | No concerns | Major concerns | No concerns | No concerns | Low      |
| Nimodipine vs Propranolol       | -- | Some concerns | -- | No concerns | Major concerns | No concerns | No concerns | Low      |
| Nimodipine vs Riboflavin        | -- | Some concerns | -- | No concerns | Major concerns | No concerns | No concerns | Low      |
| Nimodipine vs Sodium Valproate  | -- | Some concerns | -- | No concerns | Major concerns | No concerns | No concerns | Low      |
| Nimodipine vs Topiramate        | -- | Some concerns | -- | No concerns | Major concerns | No concerns | No concerns | Low      |
| Placebo vs Pregabalin           | -- | Some concerns | -- | No concerns | Major concerns | No concerns | No concerns | Low      |
| Placebo vs Propranolol          | -- | Some concerns | -- | No concerns | Major concerns | No concerns | No concerns | Low      |
| Pregabalin vs Riboflavin        | -- | Some concerns | -- | No concerns | Major concerns | No concerns | No concerns | Low      |
| Pregabalin vs Sodium Valproate  | -- | Some concerns | -- | No concerns | Major concerns | No concerns | No concerns | Low      |
| Pregabalin vs Topiramate        | -- | Some concerns | -- | No concerns | Major concerns | No concerns | No concerns | Low      |

|                                |    |               |    |             |                |             |             |            |
|--------------------------------|----|---------------|----|-------------|----------------|-------------|-------------|------------|
| Propranolol vs Riboflavin      | -- | No concerns   | -- | No concerns | Major concerns | No concerns | No concerns | Moderate ▾ |
| Riboflavin vs Sodium Valproate | -- | No concerns   | -- | No concerns | Major concerns | No concerns | No concerns | Moderate ▾ |
| Riboflavin vs Topiramate       | -- | No concerns   | -- | No concerns | Major concerns | No concerns | No concerns | Moderate ▾ |
| Sodium Valproate vs Topiramate | -- | Some concerns | -- | No concerns | Major concerns | No concerns | No concerns | Low ▾      |

## Safety

Studies showed no significant heterogeneity (within design  $Q=0.21$ ,  $p=.900$ ,  $\tau^2=0.00$ ;  $I^2=0\%$ ). In terms of inconsistency, we found no differences between the direct and indirect evidence. Finally, there was no evidence of inconsistency in the NMA according to the global design-by-treatment interaction test (between designs  $Q=0.12$ ,  $p=.732$ ).

| Comparison                        | Number of Studies | Within-study bias | Across-studies bias | Indirectness | Imprecision    | Heterogeneity | Incoherence | Confidence rating |
|-----------------------------------|-------------------|-------------------|---------------------|--------------|----------------|---------------|-------------|-------------------|
| Mixed evidence                    |                   |                   |                     |              |                |               |             |                   |
| Butterbur root extract vs Placebo | 1                 | Some concerns     | --                  | No concerns  | Major concerns | No concerns   | No concerns | Low               |
| Cinnarizine vs Propranolol        | 1                 | Some concerns     | --                  | No concerns  | Major concerns | No concerns   | No concerns | Low               |
| Flunarizine vs Placebo            | 1                 | Some concerns     | --                  | No concerns  | Major concerns | No concerns   | No concerns | Low               |
| Nimodipine vs Placebo             | 1                 | Some concerns     | --                  | No concerns  | Major concerns | No concerns   | No concerns | Low               |
| Placebo vs Riboflavin             | 1                 | No concerns       | --                  | No concerns  | Major concerns | No concerns   | No concerns | Moderate          |
| Placebo vs Sodium Valproate       | 1                 | No concerns       | --                  | No concerns  | Major concerns | No concerns   | No concerns | Moderate          |
| Placebo vs Topiramate             | 1                 | Some concerns     | --                  | No concerns  | Major concerns | No concerns   | No concerns | Low               |
| Propranolol vs Sodium Valproate   | 2                 | Some concerns     | --                  | No concerns  | Major concerns | No concerns   | No concerns | Low               |
| Propranolol vs Topiramate         | 2                 | Some concerns     | --                  | No concerns  | Major concerns | No concerns   | No concerns | Low               |

| Indirect evidence                          |    |               |    |             |                |             |             |     |
|--------------------------------------------|----|---------------|----|-------------|----------------|-------------|-------------|-----|
| Butterbur root extract vs Cinnarizine      | -- | Some concerns | -- | No concerns | Major concerns | No concerns | No concerns | Low |
| Butterbur root extract vs Flunarizine      | -- | Some concerns | -- | No concerns | Major concerns | No concerns | No concerns | Low |
| Butterbur root extract vs Nimodipine       | -- | Some concerns | -- | No concerns | Major concerns | No concerns | No concerns | Low |
| Butterbur root extract vs Propranolol      | -- | Some concerns | -- | No concerns | Major concerns | No concerns | No concerns | Low |
| Butterbur root extract vs Riboflavin       | -- | Some concerns | -- | No concerns | Major concerns | No concerns | No concerns | Low |
| Butterbur root extract vs Sodium Valproate | -- | Some concerns | -- | No concerns | Major concerns | No concerns | No concerns | Low |
| Butterbur root extract vs Topiramate       | -- | Some concerns | -- | No concerns | Major concerns | No concerns | No concerns | Low |
| Cinnarizine vs Flunarizine                 | -- | Some concerns | -- | No concerns | Major concerns | No concerns | No concerns | Low |
| Cinnarizine vs Nimodipine                  | -- | Some concerns | -- | No concerns | Major concerns | No concerns | No concerns | Low |
| Cinnarizine vs Placebo                     | -- | Some concerns | -- | No concerns | Major concerns | No concerns | No concerns | Low |
| Cinnarizine vs Riboflavin                  | -- | Some concerns | -- | No concerns | Major concerns | No concerns | No concerns | Low |
| Cinnarizine vs Sodium Valproate            | -- | Some concerns | -- | No concerns | Major concerns | No concerns | No concerns | Low |
| Cinnarizine vs Topiramate                  | -- | Some concerns | -- | No concerns | Major concerns | No concerns | No concerns | Low |
| Flunarizine vs Nimodipine                  | -- | Some concerns | -- | No concerns | Major concerns | No concerns | No concerns | Low |
| Flunarizine vs Propranolol                 | -- | Some concerns | -- | No concerns | Major concerns | No concerns | No concerns | Low |
| Flunarizine vs Riboflavin                  | -- | Some concerns | -- | No concerns | Major concerns | No concerns | No concerns | Low |
| Flunarizine vs Sodium Valproate            | -- | Some concerns | -- | No concerns | Major concerns | No concerns | No concerns | Low |
| Flunarizine vs Topiramate                  | -- | Some concerns | -- | No concerns | Major concerns | No concerns | No concerns | Low |

|                                |    |               |    |             |                |             |             |          |
|--------------------------------|----|---------------|----|-------------|----------------|-------------|-------------|----------|
| Nimodipine vs Propranolol      | -- | Some concerns | -- | No concerns | Major concerns | No concerns | No concerns | Low      |
| Nimodipine vs Riboflavin       | -- | Some concerns | -- | No concerns | Major concerns | No concerns | No concerns | Low      |
| Nimodipine vs Sodium Valproate | -- | Some concerns | -- | No concerns | Major concerns | No concerns | No concerns | Low      |
| Nimodipine vs Topiramate       | -- | Some concerns | -- | No concerns | Major concerns | No concerns | No concerns | Low      |
| Placebo vs Propranolol         | -- | Some concerns | -- | No concerns | Major concerns | No concerns | No concerns | Low      |
| Propranolol vs Riboflavin      | -- | No concerns   | -- | No concerns | Major concerns | No concerns | No concerns | Moderate |
| Riboflavin vs Sodium Valproate | -- | No concerns   | -- | No concerns | Major concerns | No concerns | No concerns | Moderate |
| Riboflavin vs Topiramate       | -- | No concerns   | -- | No concerns | Major concerns | No concerns | No concerns | Moderate |
| Sodium Valproate vs Topiramate | -- | Some concerns | -- | No concerns | Major concerns | No concerns | No concerns | Low      |

## eAppendix 3. Details on Inconsistency

### Efficacy – Local approach

Back-calculation method to split direct and indirect evidence

Random effects model:

|  | comparison                                            | k | prop | nma     | direct  | indir.  | Diff    | z     | p-value |
|--|-------------------------------------------------------|---|------|---------|---------|---------|---------|-------|---------|
|  | Butterbur root extract:Cinnarizine                    | 0 | 0    | -0.5185 | .       | -0.5185 | .       | .     | .       |
|  | Butterbur root extract:CoEnzyme Q10                   | 0 | 0    | -0.2984 | .       | -0.2984 | .       | .     | .       |
|  | Butterbur root extract:Flunarizine                    | 0 | 0    | -0.9319 | .       | -0.9319 | .       | .     | .       |
|  | Butterbur root extract:L-5-Hydroxytryptophan (L-5HTP) | 0 | 0    | 0.2068  | .       | 0.2068  | .       | .     | .       |
|  | Butterbur root extract:Nimodipine                     | 0 | 0    | -0.0000 | .       | -0.0000 | .       | .     | .       |
|  | Butterbur root extract:Placebo                        | 1 | 1.00 | -0.0000 | 0.0000  | .       | .       | .     | .       |
|  | Butterbur root extract:Pregabalin                     | 0 | 0    | -0.8139 | .       | -0.8139 | .       | .     | .       |
|  | Butterbur root extract:Propranolol                    | 0 | 0    | -0.6018 | .       | -0.6018 | .       | .     | .       |
|  | Butterbur root extract:Riboflavin                     | 0 | 0    | -0.1947 | .       | -0.1947 | .       | .     | .       |
|  | Butterbur root extract:Sodium Valproate               | 0 | 0    | -0.2175 | .       | -0.2175 | .       | .     | .       |
|  | Butterbur root extract:Topiramate                     | 0 | 0    | -0.5906 | .       | -0.5906 | .       | .     | .       |
|  | Cinnarizine:CoEnzyme Q10                              | 0 | 0    | 0.2200  | .       | 0.2200  | .       | .     | .       |
|  | Cinnarizine:Flunarizine                               | 0 | 0    | -0.4134 | .       | -0.4134 | .       | .     | .       |
|  | Cinnarizine:L-5-Hydroxytryptophan (L-5HTP)            | 0 | 0    | 0.7253  | .       | 0.7253  | .       | .     | .       |
|  | Cinnarizine:Nimodipine                                | 0 | 0    | 0.5185  | .       | 0.5185  | .       | .     | .       |
|  | Cinnarizine:Placebo                                   | 1 | 0.57 | 0.5185  | 0.2318  | 0.8918  | -0.6600 | -0.88 | 0.3798  |
|  | Cinnarizine:Pregabalin                                | 0 | 0    | -0.2954 | .       | -0.2954 | .       | .     | .       |
|  | Cinnarizine:Propranolol                               | 1 | 0.62 | -0.0833 | 0.1688  | -0.4911 | 0.6600  | 0.88  | 0.3798  |
|  | Cinnarizine:Riboflavin                                | 0 | 0    | 0.3238  | .       | 0.3238  | .       | .     | .       |
|  | Cinnarizine:Sodium Valproate                          | 0 | 0    | 0.3010  | .       | 0.3010  | .       | .     | .       |
|  | Cinnarizine:Topiramate                                | 0 | 0    | -0.0721 | .       | -0.0721 | .       | .     | .       |
|  | CoEnzyme Q10:Flunarizine                              | 0 | 0    | -0.6335 | .       | -0.6335 | .       | .     | .       |
|  | CoEnzyme Q10:L-5-Hydroxytryptophan (L-5HTP)           | 0 | 0    | 0.5053  | .       | 0.5053  | .       | .     | .       |
|  | CoEnzyme Q10:Nimodipine                               | 0 | 0    | 0.2984  | .       | 0.2984  | .       | .     | .       |
|  | CoEnzyme Q10:Placebo                                  | 1 | 1.00 | 0.2984  | 0.2984  | .       | .       | .     | .       |
|  | CoEnzyme Q10:Pregabalin                               | 0 | 0    | -0.5155 | .       | -0.5155 | .       | .     | .       |
|  | CoEnzyme Q10:Propranolol                              | 0 | 0    | -0.3034 | .       | -0.3034 | .       | .     | .       |
|  | CoEnzyme Q10:Riboflavin                               | 0 | 0    | 0.1037  | .       | 0.1037  | .       | .     | .       |
|  | CoEnzyme Q10:Sodium Valproate                         | 0 | 0    | 0.0810  | .       | 0.0810  | .       | .     | .       |
|  | CoEnzyme Q10:Topiramate                               | 0 | 0    | -0.2922 | .       | -0.2922 | .       | .     | .       |
|  | Flunarizine:L-5-Hydroxytryptophan (L-5HTP)            | 0 | 0    | 1.1387  | .       | 1.1387  | .       | .     | .       |
|  | Flunarizine:Nimodipine                                | 0 | 0    | 0.9319  | .       | 0.9319  | .       | .     | .       |
|  | Flunarizine:Placebo                                   | 1 | 1.00 | 0.9319  | 0.9319  | .       | .       | .     | .       |
|  | Flunarizine:Pregabalin                                | 0 | 0    | 0.1180  | .       | 0.1180  | .       | .     | .       |
|  | Flunarizine:Propranolol                               | 0 | 0    | 0.3301  | .       | 0.3301  | .       | .     | .       |
|  | Flunarizine:Riboflavin                                | 0 | 0    | 0.7372  | .       | 0.7372  | .       | .     | .       |
|  | Flunarizine:Sodium Valproate                          | 0 | 0    | 0.7144  | .       | 0.7144  | .       | .     | .       |
|  | Flunarizine:Topiramate                                | 0 | 0    | 0.3413  | .       | 0.3413  | .       | .     | .       |
|  | L-5-Hydroxytryptophan (L-5HTP):Nimodipine             | 0 | 0    | -0.2068 | .       | -0.2068 | .       | .     | .       |
|  | L-5-Hydroxytryptophan (L-5HTP):Placebo                | 1 | 1.00 | -0.2068 | -0.2068 | .       | .       | .     | .       |
|  | L-5-Hydroxytryptophan (L-5HTP):Pregabalin             | 0 | 0    | -1.0208 | .       | -1.0208 | .       | .     | .       |
|  | L-5-Hydroxytryptophan (L-5HTP):Propranolol            | 0 | 0    | -0.8087 | .       | -0.8087 | .       | .     | .       |
|  | L-5-Hydroxytryptophan (L-5HTP):Riboflavin             | 0 | 0    | -0.4016 | .       | -0.4016 | .       | .     | .       |
|  | L-5-Hydroxytryptophan (L-5HTP):Sodium Valproate       | 0 | 0    | -0.4243 | .       | -0.4243 | .       | .     | .       |
|  | L-5-Hydroxytryptophan (L-5HTP):Topiramate             | 0 | 0    | -0.7974 | .       | -0.7974 | .       | .     | .       |
|  | Nimodipine:Placebo                                    | 1 | 1.00 | -0.0000 | 0.0000  | .       | .       | .     | .       |
|  | Nimodipine:Pregabalin                                 | 0 | 0    | -0.8139 | .       | -0.8139 | .       | .     | .       |
|  | Nimodipine:Propranolol                                | 0 | 0    | -0.6018 | .       | -0.6018 | .       | .     | .       |
|  | Nimodipine:Riboflavin                                 | 0 | 0    | -0.1947 | .       | -0.1947 | .       | .     | .       |
|  | Nimodipine:Sodium Valproate                           | 0 | 0    | -0.2175 | .       | -0.2175 | .       | .     | .       |
|  | Nimodipine:Topiramate                                 | 0 | 0    | -0.5906 | .       | -0.5906 | .       | .     | .       |
|  | Pregabalin:Placebo                                    | 0 | 0    | 0.8139  | .       | 0.8139  | .       | .     | .       |
|  | Propranolol:Placebo                                   | 1 | 0.19 | 0.6018  | 1.5075  | 0.3876  | 1.1199  | 1.51  | 0.1300  |
|  | Riboflavin:Placebo                                    | 3 | 1.00 | 0.1947  | 0.1947  | .       | .       | .     | .       |
|  | Sodium Valproate:Placebo                              | 1 | 0.54 | 0.2175  | 0.1019  | 0.3522  | -0.2504 | -0.38 | 0.7027  |
|  | Topiramate:Placebo                                    | 2 | 0.66 | 0.5906  | 0.5533  | 0.6629  | -0.1095 | -0.18 | 0.8569  |
|  | Pregabalin:Propranolol                                | 1 | 1.00 | 0.2121  | 0.2121  | .       | .       | .     | .       |
|  | Pregabalin:Riboflavin                                 | 0 | 0    | 0.6192  | .       | 0.6192  | .       | .     | .       |
|  | Pregabalin:Sodium Valproate                           | 0 | 0    | 0.5964  | .       | 0.5964  | .       | .     | .       |
|  | Pregabalin:Topiramate                                 | 0 | 0    | 0.2233  | .       | 0.2233  | .       | .     | .       |
|  | Propranolol:Riboflavin                                | 0 | 0    | 0.4071  | .       | 0.4071  | .       | .     | .       |
|  | Propranolol:Sodium Valproate                          | 2 | 0.73 | 0.3844  | 0.3170  | 0.5673  | -0.2504 | -0.38 | 0.7027  |
|  | Propranolol:Topiramate                                | 2 | 0.70 | 0.0112  | -0.0220 | 0.0875  | -0.1095 | -0.18 | 0.8569  |
|  | Riboflavin:Sodium Valproate                           | 0 | 0    | -0.0227 | .       | -0.0227 | .       | .     | .       |
|  | Riboflavin:Topiramate                                 | 0 | 0    | -0.3959 | .       | -0.3959 | .       | .     | .       |
|  | Sodium Valproate:Topiramate                           | 0 | 0    | -0.3731 | .       | -0.3731 | .       | .     | .       |



Legend:

- comparison - Treatment comparison
- k - Number of studies providing direct evidence
- prop - Direct evidence proportion
- nma - Estimated treatment effect (SMD) in network meta-analysis
- direct - Estimated treatment effect (SMD) derived from direct evidence
- indir. - Estimated treatment effect (SMD) derived from indirect evidence
- Diff - Difference between direct and indirect treatment estimates
- z - z-value of test for disagreement (direct versus indirect)
- p-value - p-value of test for disagreement (direct versus indirect)

## Efficacy – Global approach

Q statistics to assess homogeneity / consistency

|                 | Q     | df | p-value  |
|-----------------|-------|----|----------|
| Total           | 32.13 | 8  | < 0.0001 |
| Within designs  | 26.13 | 5  | < 0.0001 |
| Between designs | 6.01  | 3  | 0.1113   |

Design-specific decomposition of within-designs Q statistic

| Design                       | Q     | df | p-value |
|------------------------------|-------|----|---------|
| Placebo:Riboflavin           | 15.98 | 2  | 0.0003  |
| Placebo:Topiramate           | 0.83  | 1  | 0.3626  |
| Propranolol:Sodium Valproate | 4.47  | 1  | 0.0345  |
| Propranolol:Topiramate       | 4.85  | 1  | 0.0276  |

Between-designs Q statistic after detaching of single designs

| Detached design              | Q    | df | p-value |
|------------------------------|------|----|---------|
| Cinnarizine:Propranolol      | 4.58 | 2  | 0.1010  |
| Placebo:Cinnarizine          | 4.58 | 2  | 0.1010  |
| Placebo:Propranolol          | 1.04 | 2  | 0.5932  |
| Placebo:Sodium Valproate     | 5.75 | 2  | 0.0563  |
| Placebo:Topiramate           | 5.91 | 2  | 0.0520  |
| Propranolol:Sodium Valproate | 5.75 | 2  | 0.0563  |
| Propranolol:Topiramate       | 5.91 | 2  | 0.0520  |

Q statistic to assess consistency under the assumption of a full design-by-treatment interaction random effects model

|                 | Q    | df | p-value | tau.within | tau2.within |
|-----------------|------|----|---------|------------|-------------|
| Between designs | 2.08 | 3  | 0.5561  | 0.5172     | 0.2675      |

## Acceptability – Local approach

Back-calculation method to split direct and indirect evidence

Random effects model:

|  | comparison                              | k | prop | nma    | direct  | indir. | RoR    | z     | p-value |
|--|-----------------------------------------|---|------|--------|---------|--------|--------|-------|---------|
|  | Amitriptylin:Butterbur root extract     | 0 | 0    | 0.6178 | .0.6178 | .      | .      | .     | .       |
|  | Amitriptylin:Cinnarizine                | 0 | 0    | 0.5162 | .0.5162 | .      | .      | .     | .       |
|  | Amitriptylin:CoEnzyme Q10               | 0 | 0    | 0.6957 | .0.6957 | .      | .      | .     | .       |
|  | Amitriptylin:Flunarizine                | 0 | 0    | 0.5870 | .0.5870 | .      | .      | .     | .       |
|  | Amitriptylin:Melatonin                  | 1 | 1.00 | 1.1739 | 1.1739  | .      | .      | .     | .       |
|  | Amitriptylin:Nimodipine                 | 0 | 0    | 0.7414 | .0.7414 | .      | .      | .     | .       |
|  | Amitriptylin:Placebo                    | 0 | 0    | 0.5870 | .0.5870 | .      | .      | .     | .       |
|  | Amitriptylin:Pregabalin                 | 0 | 0    | 0.6204 | .0.6204 | .      | .      | .     | .       |
|  | Amitriptylin:Propranolol                | 0 | 0    | 0.6069 | .0.6069 | .      | .      | .     | .       |
|  | Amitriptylin:Riboflavin                 | 0 | 0    | 1.1922 | .1.1922 | .      | .      | .     | .       |
|  | Amitriptylin:Sodium Valproate           | 0 | 0    | 0.3917 | .0.3917 | .      | .      | .     | .       |
|  | Amitriptylin:Topiramate                 | 0 | 0    | 0.5833 | .0.5833 | .      | .      | .     | .       |
|  | Butterbur root extract:Cinnarizine      | 0 | 0    | 0.8356 | .0.8356 | .      | .      | .     | .       |
|  | Butterbur root extract:CoEnzyme Q10     | 0 | 0    | 1.1259 | .1.1259 | .      | .      | .     | .       |
|  | Butterbur root extract:Flunarizine      | 0 | 0    | 0.9500 | .0.9500 | .      | .      | .     | .       |
|  | Butterbur root extract:Melatonin        | 0 | 0    | 1.9000 | .1.9000 | .      | .      | .     | .       |
|  | Butterbur root extract:Nimodipine       | 0 | 0    | 1.2000 | .1.2000 | .      | .      | .     | .       |
|  | Butterbur root extract:Placebo          | 1 | 1.00 | 0.9500 | 0.9500  | .      | .      | .     | .       |
|  | Butterbur root extract:Pregabalin       | 0 | 0    | 1.0041 | .1.0041 | .      | .      | .     | .       |
|  | Butterbur root extract:Propranolol      | 0 | 0    | 0.9822 | .0.9822 | .      | .      | .     | .       |
|  | Butterbur root extract:Riboflavin       | 0 | 0    | 1.9297 | .1.9297 | .      | .      | .     | .       |
|  | Butterbur root extract:Sodium Valproate | 0 | 0    | 0.6341 | .0.6341 | .      | .      | .     | .       |
|  | Butterbur root extract:Topiramate       | 0 | 0    | 0.9440 | .0.9440 | .      | .      | .     | .       |
|  | Cinnarizine:CoEnzyme Q10                | 0 | 0    | 1.3475 | .1.3475 | .      | .      | .     | .       |
|  | Cinnarizine:Flunarizine                 | 0 | 0    | 1.1370 | .1.1370 | .      | .      | .     | .       |
|  | Cinnarizine:Melatonin                   | 0 | 0    | 2.2739 | .2.2739 | .      | .      | .     | .       |
|  | Cinnarizine:Nimodipine                  | 0 | 0    | 1.4362 | .1.4362 | .      | .      | .     | .       |
|  | Cinnarizine:Placebo                     | 1 | 0.57 | 1.1370 | 2.0000  | 0.5449 | 3.6707 | 1.03  | 0.3026  |
|  | Cinnarizine:Pregabalin                  | 0 | 0    | 1.2017 | .1.2017 | .      | .      | .     | .       |
|  | Cinnarizine:Propranolol                 | 1 | 0.65 | 1.1756 | 0.7500  | 2.7530 | 0.2724 | -1.03 | 0.3026  |
|  | Cinnarizine:Riboflavin                  | 0 | 0    | 2.3095 | .2.3095 | .      | .      | .     | .       |
|  | Cinnarizine:Sodium Valproate            | 0 | 0    | 0.7588 | .0.7588 | .      | .      | .     | .       |
|  | Cinnarizine:Topiramate                  | 0 | 0    | 1.1298 | .1.1298 | .      | .      | .     | .       |

|                               |   |      |        |        |        |        |       |        |  |
|-------------------------------|---|------|--------|--------|--------|--------|-------|--------|--|
| CoEnzyme Q10:Flunarizine      | 0 | 0    | 0.8438 |        | 0.8438 |        |       |        |  |
| CoEnzyme Q10:Melatonin        | 0 | 0    | 1.6875 |        | 1.6875 |        |       |        |  |
| CoEnzyme Q10:Nimodipine       | 0 | 0    | 1.0658 |        | 1.0658 |        |       |        |  |
| CoEnzyme Q10:Placebo          | 1 | 1.00 | 0.8438 | 0.8438 |        |        |       |        |  |
| CoEnzyme Q10:Pregabalin       | 0 | 0    | 0.8918 |        | 0.8918 |        |       |        |  |
| CoEnzyme Q10:Propranolol      | 0 | 0    | 0.8724 |        | 0.8724 |        |       |        |  |
| CoEnzyme Q10:Riboflavin       | 0 | 0    | 1.7139 |        | 1.7139 |        |       |        |  |
| CoEnzyme Q10:Sodium Valproate | 0 | 0    | 0.5631 |        | 0.5631 |        |       |        |  |
| CoEnzyme Q10:Topiramate       | 0 | 0    | 0.8384 |        | 0.8384 |        |       |        |  |
| Flunarizine:Melatonin         | 0 | 0    | 2.0000 |        | 2.0000 |        |       |        |  |
| Flunarizine:Nimodipine        | 0 | 0    | 1.2632 |        | 1.2632 |        |       |        |  |
| Flunarizine:Placebo           | 1 | 1.00 | 1.0000 | 1.0000 |        |        |       |        |  |
| Flunarizine:Pregabalin        | 0 | 0    | 1.0569 |        | 1.0569 |        |       |        |  |
| Flunarizine:Propranolol       | 0 | 0    | 1.0339 |        | 1.0339 |        |       |        |  |
| Flunarizine:Riboflavin        | 0 | 0    | 2.0312 |        | 2.0312 |        |       |        |  |
| Flunarizine:Sodium Valproate  | 0 | 0    | 0.6674 |        | 0.6674 |        |       |        |  |
| Flunarizine:Topiramate        | 0 | 0    | 0.9937 |        | 0.9937 |        |       |        |  |
| Melatonin:Nimodipine          | 0 | 0    | 0.6316 |        | 0.6316 |        |       |        |  |
| Melatonin:Placebo             | 1 | 1.00 | 0.5000 | 0.5000 |        |        |       |        |  |
| Melatonin:Pregabalin          | 0 | 0    | 0.5285 |        | 0.5285 |        |       |        |  |
| Melatonin:Propranolol         | 0 | 0    | 0.5170 |        | 0.5170 |        |       |        |  |
| Melatonin:Riboflavin          | 0 | 0    | 1.0156 |        | 1.0156 |        |       |        |  |
| Melatonin:Sodium Valproate    | 0 | 0    | 0.3337 |        | 0.3337 |        |       |        |  |
| Melatonin:Topiramate          | 0 | 0    | 0.4968 |        | 0.4968 |        |       |        |  |
| Nimodipine:Placebo            | 1 | 1.00 | 0.7917 | 0.7917 |        |        |       |        |  |
| Nimodipine:Pregabalin         | 0 | 0    | 0.8367 |        | 0.8367 |        |       |        |  |
| Nimodipine:Propranolol        | 0 | 0    | 0.8185 |        | 0.8185 |        |       |        |  |
| Nimodipine:Riboflavin         | 0 | 0    | 1.6081 |        | 1.6081 |        |       |        |  |
| Nimodipine:Sodium Valproate   | 0 | 0    | 0.5284 |        | 0.5284 |        |       |        |  |
| Nimodipine:Topiramate         | 0 | 0    | 0.7867 |        | 0.7867 |        |       |        |  |
| Pregabalin:Placebo            | 0 | 0    | 0.9462 |        | 0.9462 |        |       |        |  |
| Propranolol:Placebo           | 0 | 0    | 0.9672 |        | 0.9672 |        |       |        |  |
| Riboflavin:Placebo            | 3 | 1.00 | 0.4923 | 0.4923 |        |        |       |        |  |
| Sodium Valproate:Placebo      | 1 | 0.84 | 1.4983 | 1.7306 | 0.6889 | 2.5123 | 0.86  | 0.3890 |  |
| Topiramate:Placebo            | 2 | 0.85 | 1.0063 | 0.7611 | 4.9417 | 0.1540 | -1.74 | 0.0815 |  |
| Pregabalin:Propranolol        | 1 | 1.00 | 0.9783 | 0.9783 |        |        |       |        |  |
| Pregabalin:Riboflavin         | 0 | 0    | 1.9219 |        | 1.9219 |        |       |        |  |
| Pregabalin:Sodium Valproate   | 0 | 0    | 0.6315 |        | 0.6315 |        |       |        |  |
| Pregabalin:Topiramate         | 0 | 0    | 0.9402 |        | 0.9402 |        |       |        |  |
| Propranolol:Riboflavin        | 0 | 0    | 1.9646 |        | 1.9646 |        |       |        |  |
| Propranolol:Sodium Valproate  | 2 | 0.55 | 0.6455 | 0.9764 | 0.3887 | 2.5123 | 0.86  | 0.3890 |  |
| Propranolol:Topiramate        | 2 | 0.53 | 0.9611 | 0.4027 | 2.6143 | 0.1540 | -1.74 | 0.0815 |  |
| Riboflavin:Sodium Valproate   | 0 | 0    | 0.3286 |        | 0.3286 |        |       |        |  |
| Riboflavin:Topiramate         | 0 | 0    | 0.4892 |        | 0.4892 |        |       |        |  |
| Sodium Valproate:Topiramate   | 0 | 0    | 1.4889 |        | 1.4889 |        |       |        |  |

Legend:

- comparison - Treatment comparison
- k - Number of studies providing direct evidence
- prop - Direct evidence proportion
- nma - Estimated treatment effect (RR) in network meta-analysis
- direct - Estimated treatment effect (RR) derived from direct evidence
- indir. - Estimated treatment effect (RR) derived from indirect evidence
- RoR - Ratio of Ratios (direct versus indirect)
- z - z-value of test for disagreement (direct versus indirect)
- p-value - p-value of test for disagreement (direct versus indirect)

## Acceptability – Global approach

Q statistics to assess homogeneity / consistency

|                 | Q    | df | p-value |
|-----------------|------|----|---------|
| Total           | 5.13 | 7  | 0.6439  |
| Within designs  | 1.99 | 5  | 0.8507  |
| Between designs | 3.14 | 2  | 0.2077  |

Design-specific decomposition of within-designs Q statistic

| Design                       | Q    | df | p-value |
|------------------------------|------|----|---------|
| Placebo:Riboflavin           | 1.20 | 2  | 0.5500  |
| Placebo:Topiramate           | 0.04 | 1  | 0.8359  |
| Propranolol:Sodium Valproate | 0.51 | 1  | 0.4756  |
| Propranolol:Topiramate       | 0.24 | 1  | 0.6230  |

Between-designs Q statistic after detaching of single designs

| Detached design              | Q    | df | p-value |
|------------------------------|------|----|---------|
| Cinnarizine:Propranolol      | 2.08 | 1  | 0.1492  |
| Placebo:Cinnarizine          | 2.08 | 1  | 0.1492  |
| Placebo:Sodium Valproate     | 2.40 | 1  | 0.1213  |
| Placebo:Topiramate           | 0.11 | 1  | 0.7429  |
| Propranolol:Sodium Valproate | 2.40 | 1  | 0.1213  |
| Propranolol:Topiramate       | 0.11 | 1  | 0.7429  |

Q statistic to assess consistency under the assumption of a full design-by-treatment interaction random effects model

|                 | Q    | df | p-value | tau.within | tau2.within |
|-----------------|------|----|---------|------------|-------------|
| Between designs | 3.14 | 2  | 0.2077  | 0          | 0           |

## Safety – Local approach

Back-calculation method to split direct and indirect evidence

Random effects model:

|  | comparison                              | k | prop | nma    | direct | indir. | RoR    | z     | p-value |
|--|-----------------------------------------|---|------|--------|--------|--------|--------|-------|---------|
|  | Butterbur root extract:Cinnarizine      | 0 | 0    | 0.5424 | .      | 0.5424 | .      | .     | .       |
|  | Butterbur root extract:Flunarizine      | 0 | 0    | 0.1359 | .      | 0.1359 | .      | .     | .       |
|  | Butterbur root extract:Nimodipine       | 0 | 0    | 0.9024 | .      | 0.9024 | .      | .     | .       |
|  | Butterbur root extract:Placebo          | 1 | 1.00 | 0.9512 | 0.9512 | .      | .      | .     | .       |
|  | Butterbur root extract:Propranolol      | 0 | 0    | 0.5424 | .      | 0.5424 | .      | .     | .       |
|  | Butterbur root extract:Riboflavin       | 0 | 0    | 1.2167 | .      | 1.2167 | .      | .     | .       |
|  | Butterbur root extract:Sodium Valproate | 0 | 0    | 0.3962 | .      | 0.3962 | .      | .     | .       |
|  | Butterbur root extract:Topiramate       | 0 | 0    | 0.2839 | .      | 0.2839 | .      | .     | .       |
|  | Cinnarizine:Flunarizine                 | 0 | 0    | 0.2505 | .      | 0.2505 | .      | .     | .       |
|  | Cinnarizine:Nimodipine                  | 0 | 0    | 1.6639 | .      | 1.6639 | .      | .     | .       |
|  | Cinnarizine:Placebo                     | 0 | 0    | 1.7538 | .      | 1.7538 | .      | .     | .       |
|  | Cinnarizine:Propranolol                 | 1 | 1.00 | 1.0000 | 1.0000 | .      | .      | .     | .       |
|  | Cinnarizine:Riboflavin                  | 0 | 0    | 2.2433 | .      | 2.2433 | .      | .     | .       |
|  | Cinnarizine:Sodium Valproate            | 0 | 0    | 0.7305 | .      | 0.7305 | .      | .     | .       |
|  | Cinnarizine:Topiramate                  | 0 | 0    | 0.5234 | .      | 0.5234 | .      | .     | .       |
|  | Flunarizine:Nimodipine                  | 0 | 0    | 6.6410 | .      | 6.6410 | .      | .     | .       |
|  | Flunarizine:Placebo                     | 1 | 1.00 | 7.0000 | 7.0000 | .      | .      | .     | .       |
|  | Flunarizine:Propranolol                 | 0 | 0    | 3.9913 | .      | 3.9913 | .      | .     | .       |
|  | Flunarizine:Riboflavin                  | 0 | 0    | 8.9535 | .      | 8.9535 | .      | .     | .       |
|  | Flunarizine:Sodium Valproate            | 0 | 0    | 2.9155 | .      | 2.9155 | .      | .     | .       |
|  | Flunarizine:Topiramate                  | 0 | 0    | 2.0890 | .      | 2.0890 | .      | .     | .       |
|  | Nimodipine:Placebo                      | 1 | 1.00 | 1.0541 | 1.0541 | .      | .      | .     | .       |
|  | Nimodipine:Propranolol                  | 0 | 0    | 0.6010 | .      | 0.6010 | .      | .     | .       |
|  | Nimodipine:Riboflavin                   | 0 | 0    | 1.3482 | .      | 1.3482 | .      | .     | .       |
|  | Nimodipine:Sodium Valproate             | 0 | 0    | 0.4390 | .      | 0.4390 | .      | .     | .       |
|  | Nimodipine:Topiramate                   | 0 | 0    | 0.3146 | .      | 0.3146 | .      | .     | .       |
|  | Propranolol:Placebo                     | 0 | 0    | 1.7538 | .      | 1.7538 | .      | .     | .       |
|  | Riboflavin:Placebo                      | 1 | 1.00 | 0.7818 | 0.7818 | .      | .      | .     | .       |
|  | Sodium Valproate:Placebo                | 1 | 0.79 | 2.4010 | 2.8319 | 1.2987 | 2.1805 | 0.34  | 0.7315  |
|  | Topiramate:Placebo                      | 1 | 0.78 | 3.3508 | 2.8286 | 6.1678 | 0.4586 | -0.34 | 0.7315  |
|  | Propranolol:Riboflavin                  | 0 | 0    | 2.2433 | .      | 2.2433 | .      | .     | .       |
|  | Propranolol:Sodium Valproate            | 2 | 0.62 | 0.7305 | 0.9844 | 0.4515 | 2.1805 | 0.34  | 0.7315  |
|  | Propranolol:Topiramate                  | 2 | 0.81 | 0.5234 | 0.4520 | 0.9856 | 0.4586 | -0.34 | 0.7315  |
|  | Riboflavin:Sodium Valproate             | 0 | 0    | 0.3256 | .      | 0.3256 | .      | .     | .       |
|  | Riboflavin:Topiramate                   | 0 | 0    | 0.2333 | .      | 0.2333 | .      | .     | .       |
|  | Sodium Valproate:Topiramate             | 0 | 0    | 0.7165 | .      | 0.7165 | .      | .     | .       |

### Legend:

- comparison - Treatment comparison
- k - Number of studies providing direct evidence
- prop - Direct evidence proportion
- nma - Estimated treatment effect (RR) in network meta-analysis
- direct - Estimated treatment effect (RR) derived from direct evidence
- indir. - Estimated treatment effect (RR) derived from indirect evidence
- RoR - Ratio of Ratios (direct versus indirect)
- z - z-value of test for disagreement (direct versus indirect)
- p-value - p-value of test for disagreement (direct versus indirect)

## Safety – Global approach

Q statistics to assess homogeneity / consistency

|                 | Q    | df | p-value |
|-----------------|------|----|---------|
| Total           | 0.33 | 3  | 0.9545  |
| Within designs  | 0.21 | 2  | 0.8998  |
| Between designs | 0.12 | 1  | 0.7315  |

Design-specific decomposition of within-designs Q statistic

| Design                       | Q    | df | p-value |
|------------------------------|------|----|---------|
| Propranolol:Sodium Valproate | 0.00 | 1  | 0.9911  |
| Propranolol:Topiramate       | 0.21 | 1  | 0.6460  |

Between-designs Q statistic after detaching of single designs

| Detached design              | Q    | df | p-value |
|------------------------------|------|----|---------|
| Placebo:Sodium Valproate     | 0.00 | 0  | --      |
| Placebo:Topiramate           | 0.00 | 0  | --      |
| Propranolol:Sodium Valproate | 0.00 | 0  | --      |
| Propranolol:Topiramate       | 0.00 | 0  | --      |

Q statistic to assess consistency under the assumption of a full design-by-treatment interaction random effects model

|                 | Q    | df | p-value | tau.within | tau2.within |
|-----------------|------|----|---------|------------|-------------|
| Between designs | 0.12 | 1  | 0.7315  | 0          | 0           |

#### **eAppendix 4. Details on Publication Bias**

Currently, there is a lack of a concrete methodology of assessing across-studies bias (publication bias) for a network meta-analytic approach. Therefore, a comparison-adjusted funnel plot with accompanying Egger test for asymmetry was conducted<sup>2</sup>. See eFigures 2, 3, and 4 for results.

## eAppendix 5. Details on Prediction Intervals

Prediction intervals help in the clinical interpretation of the *heterogeneity* by providing a region within which a given percentage of true treatment effects are expected, were calculated.<sup>1</sup> For example, a 95% prediction interval estimates where the true effects are to be expected for 95% of similar (exchangeable) studies that might be conducted in the future. Reporting a prediction interval in addition to the standardized mean differences and confidence intervals can help estimate the range of true effects that can be expected in future settings.

### 70% Prediction Interval

Number of studies:  $k = 19$   
Number of treatments:  $n = 12$   
Number of pairwise comparisons:  $m = 19$   
Number of designs:  $d = 14$

Random effects model

Treatment estimate (sm = 'SMD', comparison: other treatments vs 'Placebo'):

|                                | SMD     | 95%-CI            | 70%-PI            |
|--------------------------------|---------|-------------------|-------------------|
| Butterbur root extract         | -0.0000 | [-1.1517; 1.1517] | [-0.8113; 0.8113] |
| Cinnarizine                    | 0.5185  | [-0.2116; 1.2486] | [-0.1136; 1.1506] |
| CoEnzyme Q10                   | 0.2984  | [-0.6082; 1.2051] | [-0.4042; 1.0011] |
| Flunarizine                    | 0.9319  | [-0.1179; 1.9817] | [ 0.1670; 1.6968] |
| L-5-Hydroxytryptophan (L-5HTP) | -0.2068 | [-1.4029; 0.9893] | [-1.0388; 0.6252] |
| Nimodipine                     | -0.0000 | [-1.0526; 1.0526] | [-0.7662; 0.7662] |
| Placebo                        | .       | .                 | .                 |
| Pregabalin                     | 0.8139  | [-0.2757; 1.9036] | [ 0.0310; 1.5968] |
| Propranolol                    | 0.6018  | [ 0.0317; 1.1720] | [ 0.0259; 1.1778] |
| Riboflavin                     | 0.1947  | [-0.3883; 0.7778] | [-0.3855; 0.7749] |
| Sodium Valproate               | 0.2175  | [-0.4235; 0.8585] | [-0.3823; 0.8173] |
| Topiramate                     | 0.5906  | [ 0.0266; 1.1547] | [ 0.0166; 1.1646] |

Quantifying heterogeneity / inconsistency:

$\tau^2 = 0.1803$ ;  $I^2 = 75.1\%$

Tests of heterogeneity (within designs) and inconsistency (between designs):

|                 | Q     | d.f. | p-value  |
|-----------------|-------|------|----------|
| Total           | 32.13 | 8    | < 0.0001 |
| Within designs  | 26.13 | 5    | < 0.0001 |
| Between designs | 6.01  | 3    | 0.1113   |



## 75% Prediction Interval

Number of studies: k = 19  
Number of treatments: n = 12  
Number of pairwise comparisons: m = 19  
Number of designs: d = 14

Random effects model

Treatment estimate (sm = 'SMD', comparison: other treatments vs 'Placebo'):

|                                | SMD     | 95%-CI            | 75%-PI            |
|--------------------------------|---------|-------------------|-------------------|
| Butterbur root extract         | -0.0000 | [-1.1517; 1.1517] | [-0.9093; 0.9093] |
| Cinnarizine                    | 0.5185  | [-0.2116; 1.2486] | [-0.1899; 1.2269] |
| CoEnzyme Q10                   | 0.2984  | [-0.6082; 1.2051] | [-0.4891; 1.0860] |
| Flunarizine                    | 0.9319  | [-0.1179; 1.9817] | [ 0.0746; 1.7892] |
| L-5-Hydroxytryptophan (L-5HTP) | -0.2068 | [-1.4029; 0.9893] | [-1.1393; 0.7256] |
| Nimodipine                     | -0.0000 | [-1.0526; 1.0526] | [-0.8587; 0.8587] |
| Placebo                        | .       | .                 | .                 |
| Pregabalin                     | 0.8139  | [-0.2757; 1.9036] | [-0.0635; 1.6913] |
| Propranolol                    | 0.6018  | [ 0.0317; 1.1720] | [-0.0437; 1.2474] |
| Riboflavin                     | 0.1947  | [-0.3883; 0.7778] | [-0.4555; 0.8450] |
| Sodium Valproate               | 0.2175  | [-0.4235; 0.8585] | [-0.4547; 0.8897] |
| Topiramate                     | 0.5906  | [ 0.0266; 1.1547] | [-0.0527; 1.2339] |

Quantifying heterogeneity / inconsistency:

tau<sup>2</sup> = 0.1803; I<sup>2</sup> = 75.1%

Tests of heterogeneity (within designs) and inconsistency (between designs):

|                 | Q     | d.f. | p-value  |
|-----------------|-------|------|----------|
| Total           | 32.13 | 8    | < 0.0001 |
| Within designs  | 26.13 | 5    | < 0.0001 |
| Between designs | 6.01  | 3    | 0.1113   |

## 95% Prediction Interval

Number of studies: k = 19  
Number of treatments: n = 12  
Number of pairwise comparisons: m = 19  
Number of designs: d = 14

Random effects model

Treatment estimate (sm = 'SMD', comparison: other treatments vs 'Placebo'):

|                                | SMD     | 95%-CI            | 95%-PI            |
|--------------------------------|---------|-------------------|-------------------|
| Butterbur root extract         | -0.0000 | [-1.1517; 1.1517] | [-1.7142; 1.7142] |
| Cinnarizine                    | 0.5185  | [-0.2116; 1.2486] | [-0.8171; 1.8540] |
| CoEnzyme Q10                   | 0.2984  | [-0.6082; 1.2051] | [-1.1862; 1.7831] |
| Flunarizine                    | 0.9319  | [-0.1179; 1.9817] | [-0.6843; 2.5481] |
| L-5-Hydroxytryptophan (L-5HTP) | -0.2068 | [-1.4029; 0.9893] | [-1.9647; 1.5511] |
| Nimodipine                     | -0.0000 | [-1.0526; 1.0526] | [-1.6189; 1.6189] |
| Placebo                        | .       | .                 | .                 |
| Pregabalin                     | 0.8139  | [-0.2757; 1.9036] | [-0.8402; 2.4681] |
| Propranolol                    | 0.6018  | [ 0.0317; 1.1720] | [-0.6151; 1.8188] |
| Riboflavin                     | 0.1947  | [-0.3883; 0.7778] | [-1.0311; 1.4206] |
| Sodium Valproate               | 0.2175  | [-0.4235; 0.8585] | [-1.0498; 1.4847] |
| Topiramate                     | 0.5906  | [ 0.0266; 1.1547] | [-0.6222; 1.8034] |

Quantifying heterogeneity / inconsistency:

tau<sup>2</sup> = 0.1803; I<sup>2</sup> = 75.1%

Tests of heterogeneity (within designs) and inconsistency (between designs):

|                 | Q     | d.f. | p-value  |
|-----------------|-------|------|----------|
| Total           | 32.13 | 8    | < 0.0001 |
| Within designs  | 26.13 | 5    | < 0.0001 |
| Between designs | 6.01  | 3    | 0.1113   |

## **eAppendix 6. Results of Long-term Analysis**

For the analysis of long-term effects, we added the measurements with 5-6 months as well as more than 6 months to the data-set. We preferably considered the data with the longest time window after randomization. Two additional studies were considered in the long-term analysis which were not included in the main analysis<sup>7,8</sup>. See eFigures 5, 6, and 7 and eTables 3a, 3b, and 3c for results.

**eFigure 1. Flow Chart**

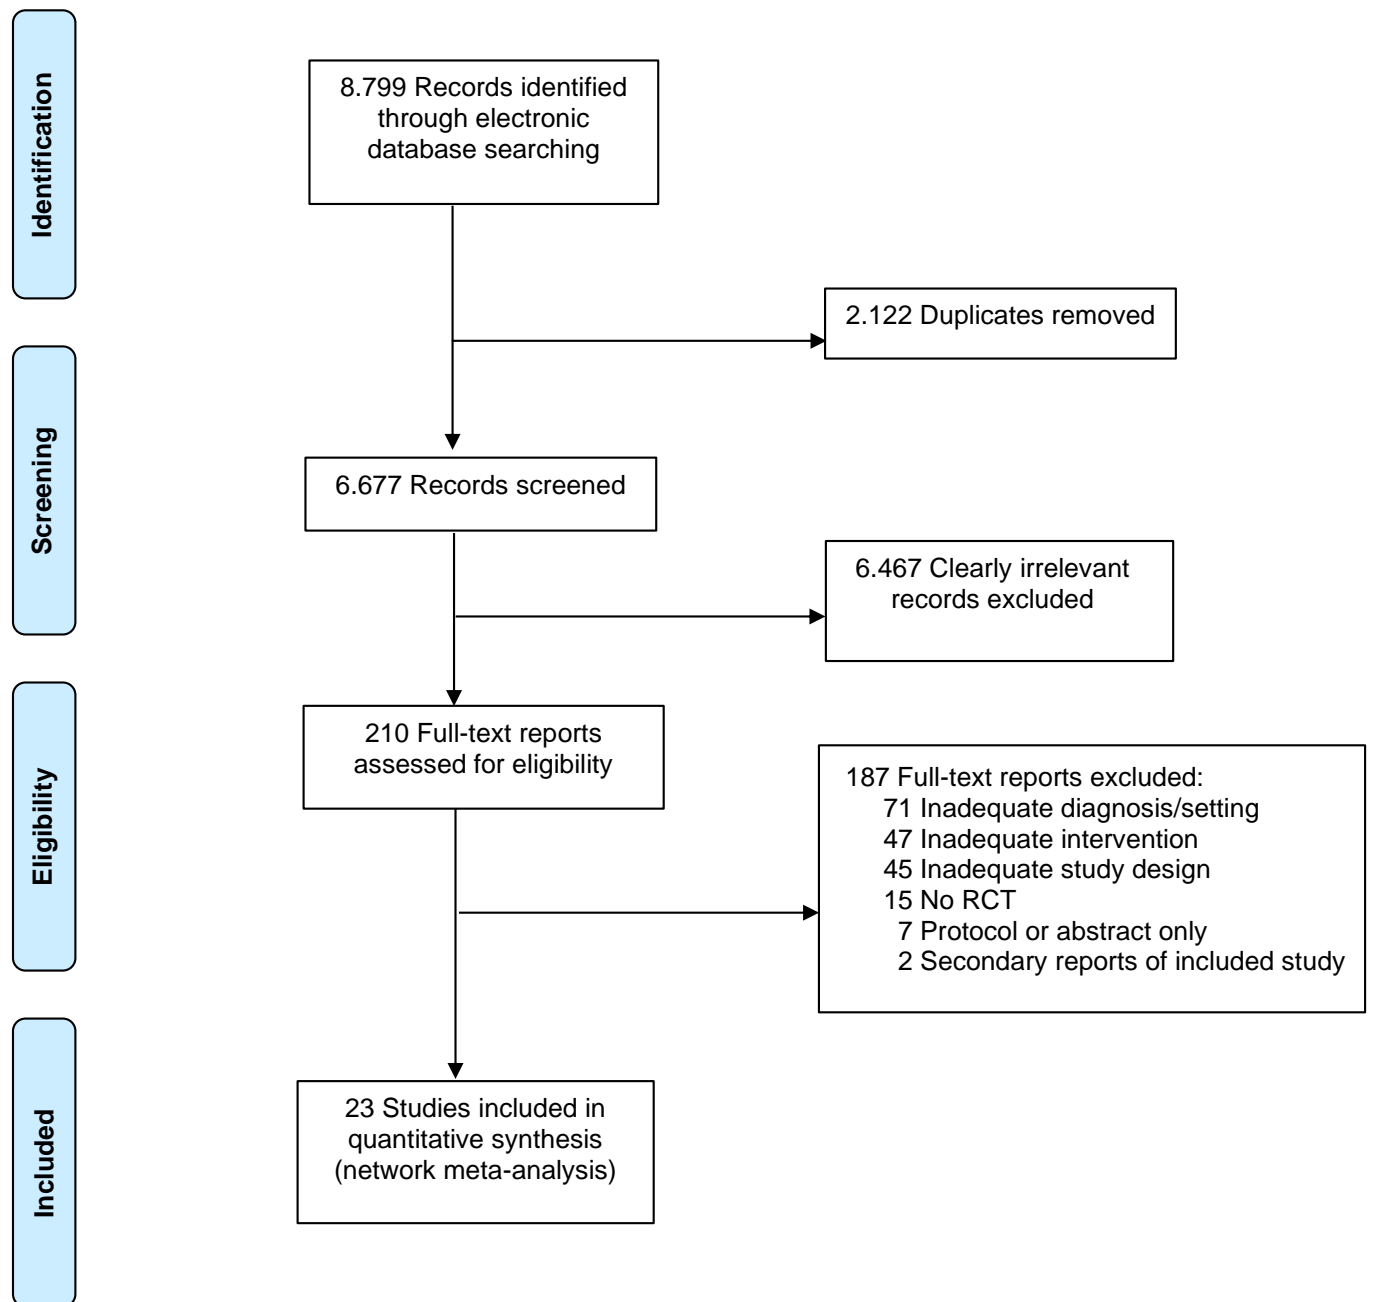

**eFigure 2. Funnel plot with accompanying Egger test: Efficacy**

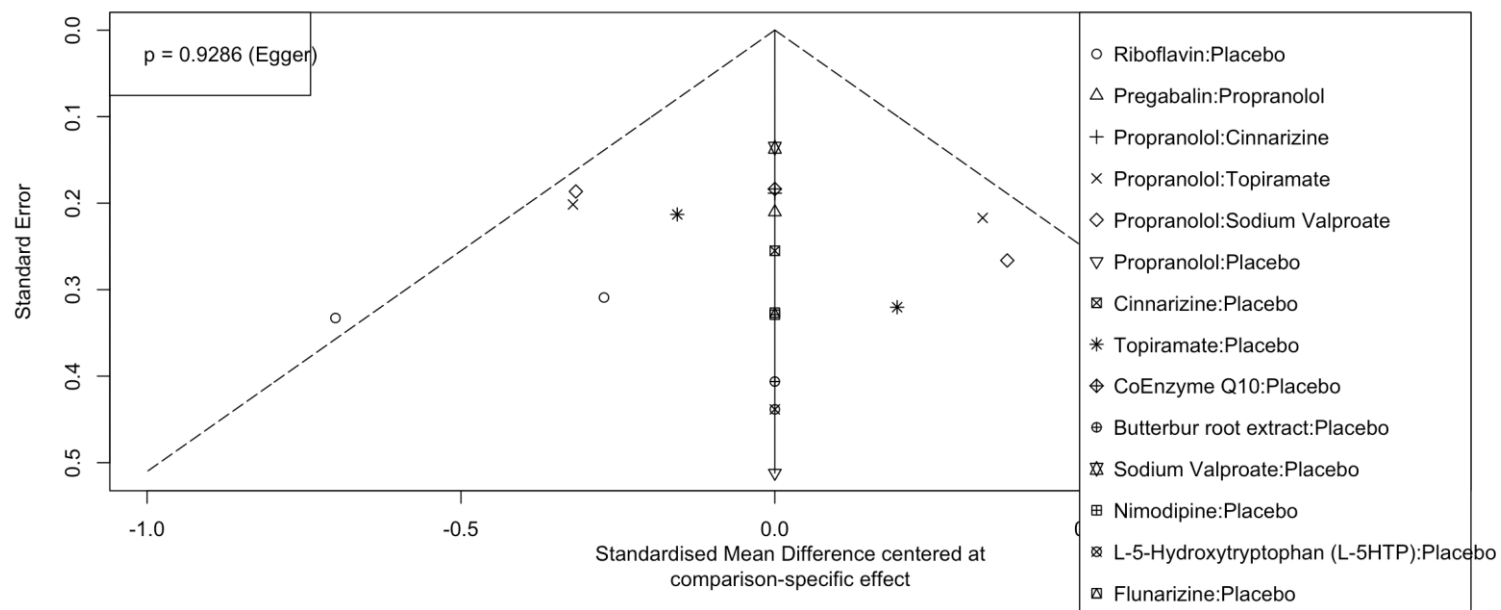

**eFigure 3. Funnel plot with accompanying Egger test: Acceptability**

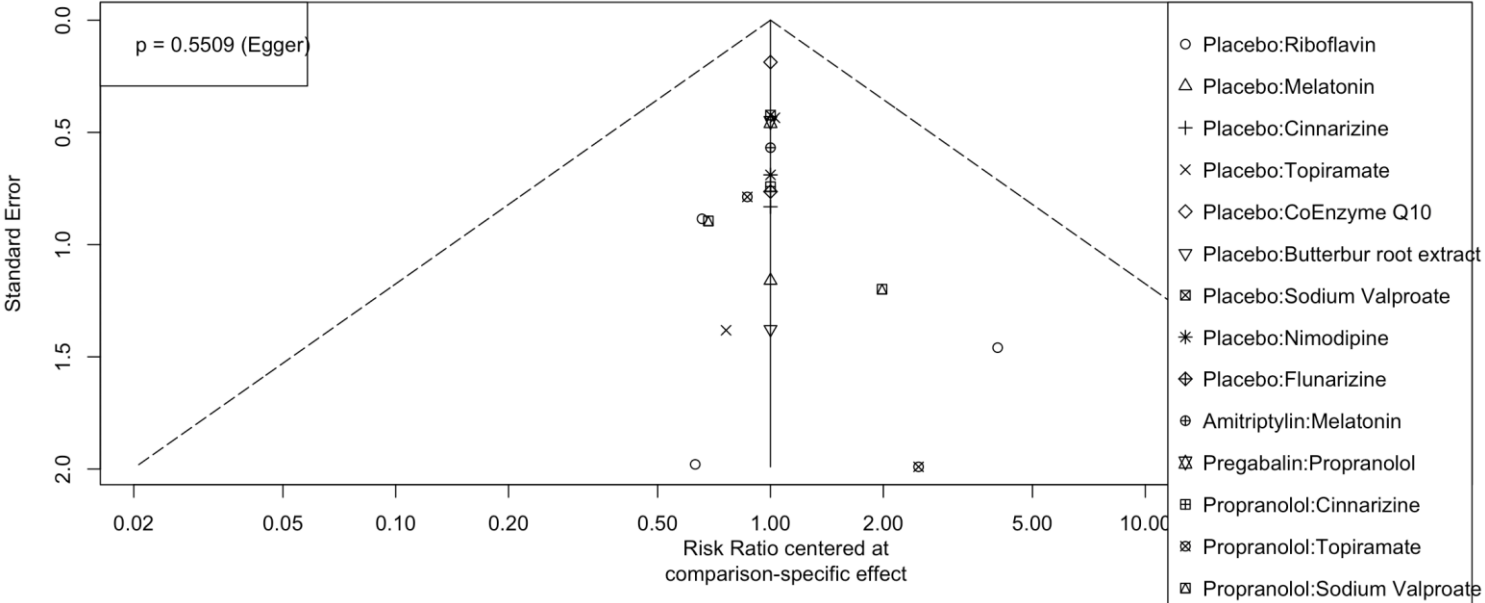

eFigure 4. Funnel plot with accompanying Egger test: Safety

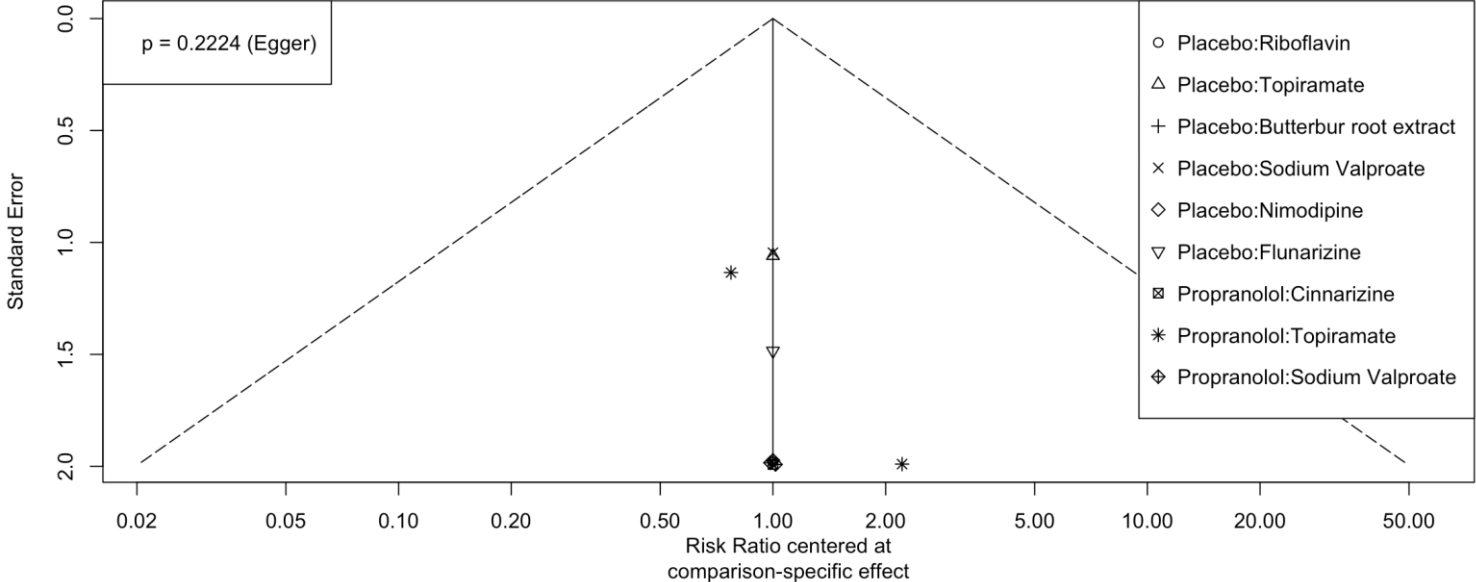

**eFigure 5. Long-Term Efficacy – Forest Plot**

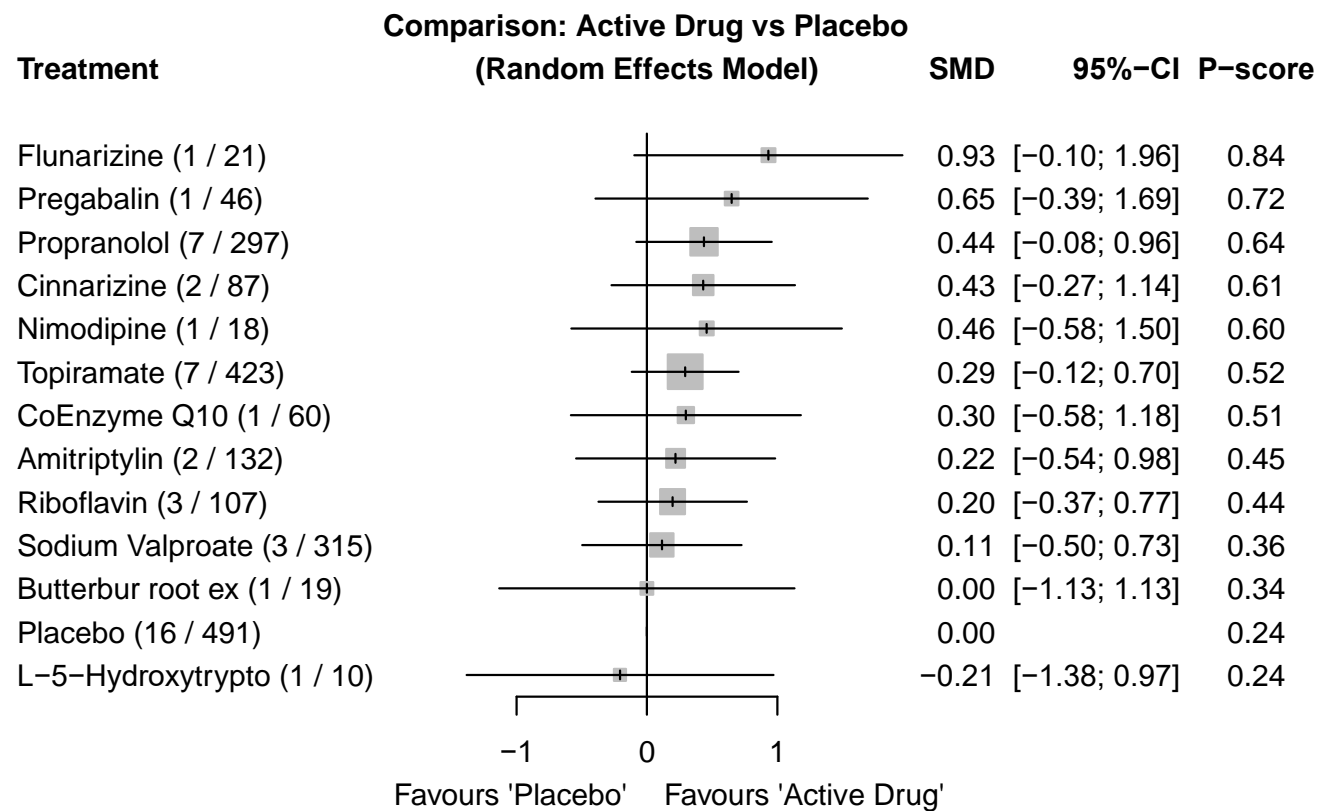

**eFigure 6. Long-Term Acceptability – Forest Plot**

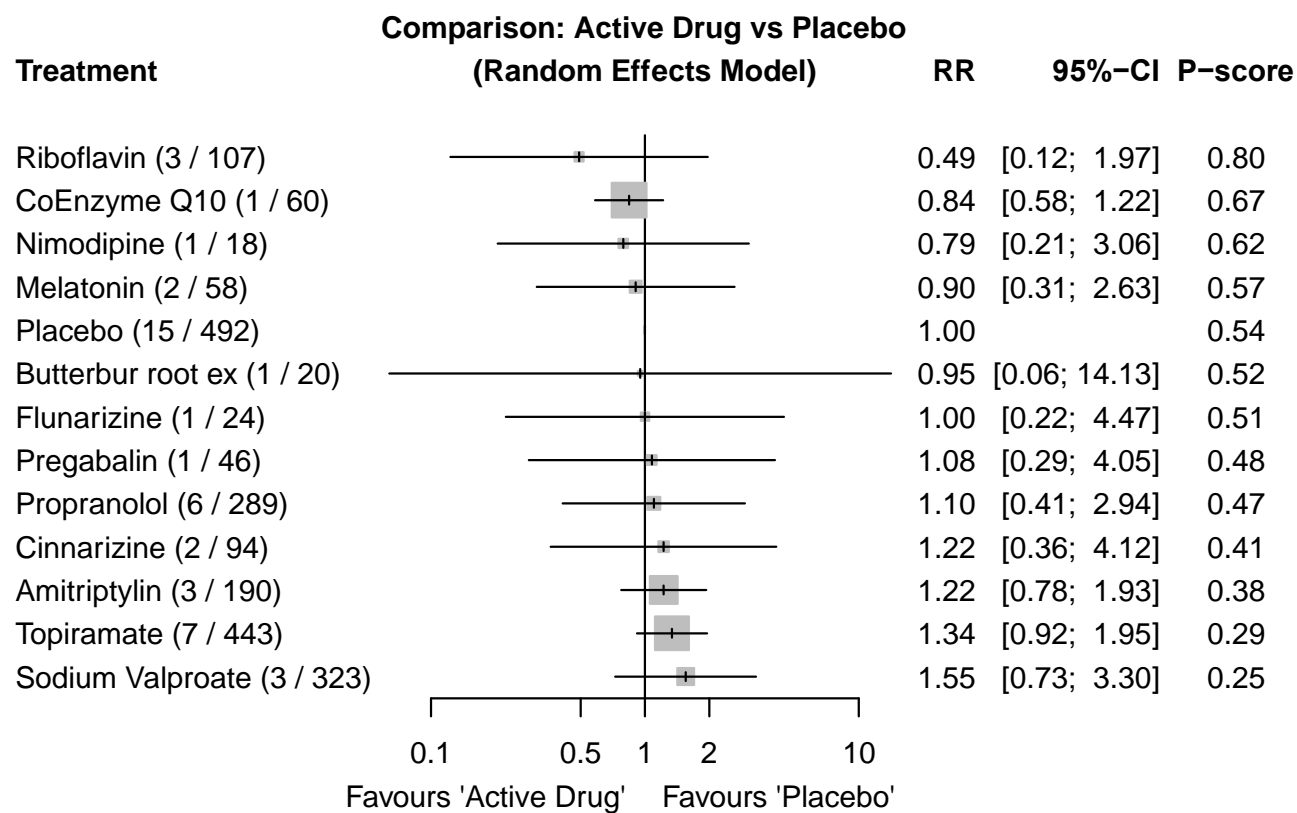



**eFigure 7. Long-Term Safety – Forest Plot**

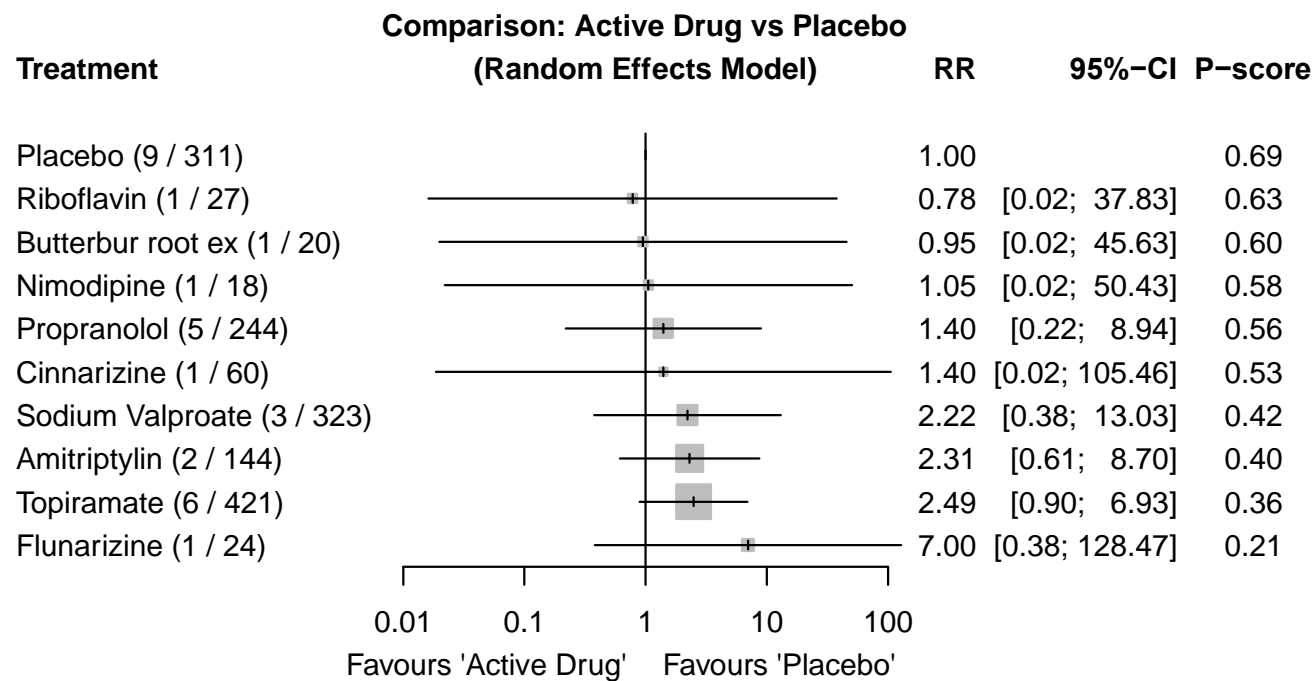

**eTable 1a. Demographics and Study Characteristics**

| Study ID              | Main Outcome                        | Intervention 1                                        | Intervention 2                                      | Intervention 3                                       | Control                      | Diagnosis                      | Diagnosis criteria  | Mean age per group, years (SD)                                                             | % Female per group                                         | Country      | Risk of Bias <sup>a</sup> |
|-----------------------|-------------------------------------|-------------------------------------------------------|-----------------------------------------------------|------------------------------------------------------|------------------------------|--------------------------------|---------------------|--------------------------------------------------------------------------------------------|------------------------------------------------------------|--------------|---------------------------|
| Apostol 2008          | Efficacy<br>Acceptability<br>Safety | 250 mg/day<br>Divalproex sodium<br>extended release   | 500 mg/day<br>Divalproex sodium<br>extended release | 1000 mg/day<br>Divalproex sodium<br>extended release | Placebo<br>Identical tablets | migraine                       | ICHD second edition | 250 mg: 14.2 (1.69)<br>500 mg: 14.1 (1.56)<br>1000 mg: 14.3 (1.66)<br>Placebo: 14.2 (1.50) | 250 mg: 64.2<br>500 mg: 54<br>1000 mg: 46.6<br>Placebo: 52 | USA          | Low                       |
| Ashrafi 2005          | Efficacy<br>Acceptability<br>Safety | Sodium Valproate (up to 40 mg/kg/day in 2 doses)      | Propranolol (1–3 mg/kg/day in two doses)            | -                                                    | -                            | migraine without aura          | ICHD first edition  | Sodium Valproate: 10.0 (2.30)<br>Propranolol: 10.0 (2.70)                                  | Sodium Valproate: 36.8<br>Propranolol: 31                  | not reported | Moderate                  |
| Ashrafi 2014          | Efficacy<br>Acceptability           | Cinnarizine (1.5 mg/kg/day for <30kg, if >30kg: 50mg) |                                                     | -                                                    | Placebo Pill                 | migraine with and without aura | ICHD second edition | Cinnarizine: 16.7 (2.4)<br>Placebo: 8.9 (1.9)                                              | Cinnarizine: 46.6<br>Placebo: 65.6                         | Iran         | Low                       |
| Bakhshandeh Bali 2015 | Efficacy<br>Acceptability           | Pregabalin (50-75 mg/day)                             | Propranolol (10-20 mg/day, in 2 doses)              | -                                                    | -                            | migraine with and without aura | ICHD second edition | Pregabalin: 9.95 (n.r.)<br>Propranolol: 9.81 (n.r.)                                        | Pregabalin: 26<br>Propranolol: 31.1                        | Iran         | Moderate                  |
| Battistella 1990      | Efficacy<br>Acceptability<br>Safety | Nimodipine (10-20 mg/day in 3 doses)                  | -                                                   | -                                                    | Placebo Drops                | migraine with and without aura | ICHD first edition  | Nimodipine: 12.0 (3.4)<br>Placebo: 12.4 (3.3)                                              | Nimodipine: 50<br>Placebo: 52.6                            | Italy        | Moderate                  |

**eTable 1a. Demographics and Study Characteristics. Continued.**

| <b>Study ID</b>           | <b>Main Outcome</b>                 | <b>Intervention 1</b>                                              | <b>Intervention 2</b>                                                     | <b>Intervention 3</b> | <b>Control</b>               | <b>Diagnosis</b>               | <b>Diagnosis criteria</b>         | <b>Mean age per group, years (SD)</b>                  | <b>% Female per group</b>              | <b>Country</b> | <b>Risk of Bias<sup>a</sup></b> |
|---------------------------|-------------------------------------|--------------------------------------------------------------------|---------------------------------------------------------------------------|-----------------------|------------------------------|--------------------------------|-----------------------------------|--------------------------------------------------------|----------------------------------------|----------------|---------------------------------|
| Bidabadi 2010             | Efficacy<br>Acceptability<br>Safety | Propranolol (3 mg/kg/day in 2 doses; after one month: 2 mg/kg/day) | Sodium Valproate (30 mg/kg/day in 2 doses; after one month: 15 mg/kg/day) | -                     | -                            | migraine without aura          | ICHD second edition               | Propranolol: 9.8 (2.8)<br>Sodium Valproate: 9.9 (2.57) | Propranolol: 37<br>Sodium Valproate 30 | Iran           | Moderate                        |
| Bruijn 2010               | Efficacy<br>Acceptability           | Riboflavin (50 mg/day)                                             | -                                                                         | -                     | Placebo<br>Carotene capsules | migraine with and without aura | ICHD second edition               | Riboflavin: 9.9 (1.89)<br>Placebo: 9.5 (1.63)          | Riboflavin: 40<br>Placebo: 45.5        | Netherlands    | Low                             |
| Fallah 2013               | Efficacy<br>Acceptability<br>Safety | Topiramate (3 mg/kg/day)                                           | Propranolol (1 mg/kg/day)                                                 | -                     | -                            | migraine with and without aura | n.r.                              | Topiramate: 10.1 (2.24)<br>Propranolol: 10.7 (2.35)    | Topiramate: 58<br>Propranolol: 46      | Iran           | Low                             |
| Fallah 2018 <sup>b</sup>  | Acceptability                       | Amitriptylin (1 mg/kg/day; max. 50 mg/day)                         | Melatonin (0.3 mg/kg/day; max. 6 mg/day)                                  | -                     | -                            | migraine with and without aura | ICHD second edition               | Amitriptylin: 10.1 (2.13)<br>Melatonin: 10.6 (2.44)    | Amitriptylin: 47.5<br>Melatonin: 55.0  | Iran           | Low                             |
| Gelfand 2017 <sup>c</sup> | Acceptability                       | Melatonin (3 mg/day)                                               | -                                                                         | -                     | Placebo                      | migraine                       | ICHD third edition (beta version) | -                                                      | -                                      | USA            | Low                             |

**eTable 1a. Demographics and Study Characteristics. Continued.**

| <b>Study ID</b> | <b>Main Outcome</b>                 | <b>Intervention 1</b>                                                                  | <b>Intervention 2</b> | <b>Intervention 3</b> | <b>Control</b>  | <b>Diagnosis</b>               | <b>Diagnosis criteria</b>                      | <b>Mean age per group, years (SD)</b>                                               | <b>% Female per group</b>                                           | <b>Country</b> | <b>Risk of Bias<sup>a</sup></b> |
|-----------------|-------------------------------------|----------------------------------------------------------------------------------------|-----------------------|-----------------------|-----------------|--------------------------------|------------------------------------------------|-------------------------------------------------------------------------------------|---------------------------------------------------------------------|----------------|---------------------------------|
| Lakshmi 2007    | Efficacy<br>Acceptability           | Topiramate (25-100 mg/day in 2 doses [baseline] 100 mg in 2 doses [maintenance phase]) | -                     | -                     | Placebo Pill    | migraine with and without aura | ICHD second edition                            | Topiramate: 10.95 (1.53)<br>Placebo: 10.14 (1.35)                                   | Topiramate: 14.29<br>Placebo: 47.62                                 | India          | Low                             |
| Lewis 2009      | Efficacy<br>Acceptability<br>Safety | Topiramate 50 mg/day                                                                   | Topiramate 100 mg/day | -                     | Placebo Capsule | migraine                       | ICHD second edition                            | Topiramate 50mg: 14.2 (1.6)<br>Topiramate 100mg: 14.2 (1.5)<br>Placebo: 14.4 (1.70) | Topiramate 50mg: 71.43<br>Topiramate 100mg: 48.57<br>Placebo: 63.64 | US and non-US  | Moderate                        |
| Ludvigsson 1974 | Efficacy                            | Propranolol (<35kg: max. 60 mg/day in 3 doses; >35kg max 120 mg/day in 3 doses)        | -                     | -                     | Placebo Pill    | migraine                       | Ad hoc Committee on classification of headache | n.r.                                                                                | Propranolol: 43.75<br>Placebo: 43.75                                | Sweden         | Moderate                        |
| MacLennan 2008  | Efficacy<br>Acceptability<br>Safety | Riboflavin (200 mg/day)                                                                | -                     | -                     | Placebo Pill    | migraine with and without aura | ICHD second edition                            | Riboflavin: 11.1 (2.1)<br>Placebo: 11.5 (2.5)                                       | Riboflavin: 44.44<br>Placebo: 57.14                                 | Australia      | Low                             |

**eTable 1a. Demographics and Study Characteristics. Continued.**

| <b>Study ID</b> | <b>Main Outcome</b>                 | <b>Intervention 1</b>                                                                                                                                    | <b>Intervention 2</b> | <b>Intervention 3</b> | <b>Control</b>                         | <b>Diagnosis</b>               | <b>Diagnosis criteria</b>                                             | <b>Mean age per group, years (SD)</b>                     | <b>% Female per group</b>                     | <b>Country</b> | <b>Risk of Bias<sup>a</sup></b> |
|-----------------|-------------------------------------|----------------------------------------------------------------------------------------------------------------------------------------------------------|-----------------------|-----------------------|----------------------------------------|--------------------------------|-----------------------------------------------------------------------|-----------------------------------------------------------|-----------------------------------------------|----------------|---------------------------------|
| Oelkers 2008    | Efficacy<br>Acceptability<br>Safety | Butterbur root extract<br>(8-9 years: 50mg/day in 2 doses [if no improvement: 75mg/day]; 10-12 years: 100mg/d in 2 doses [if no improvement: 150mg/day]) |                       | -                     | Placebo                                | migraine with and without aura | ICHD first edition (24h-rule replaced with 18h-rule)                  | Butterbur root extract: 10.6 (1.2)<br>Placebo: 10.6 (1.5) | Butterbur root extract: 47.4<br>Placebo: 31.6 | Germany        | Moderate                        |
| Santucci 1986   | Efficacy                            | L-5-Hydroxytryptophan (5mg/kg/day in 3 doses)                                                                                                            | -                     | -                     | Placebo<br>Identical gelatine capsules | common migraine                | In accordance with the ad hoc Committee on classification of headache | Age range? 6-11                                           | < 50% female                                  | Italy          | Moderate                        |
| Slater 2011     | Efficacy<br>Acceptability           | CoEnzyme Q10 as chewable tablets (100mg/day)                                                                                                             | -                     | -                     | Placebo<br>Chewable tablets            | migraine with and without aura | ICHD second edition                                                   | CoEnzyme Q10: 13.3 (3)<br>Placebo: 14 (2.6)               | CoEnzyme Q10: 66.7<br>Placebo: 63.3           | USA            | Moderate                        |
| Sorge 1985      | Efficacy<br>Acceptability<br>Safety | Flunarizine (5 mg/day)                                                                                                                                   | -                     | -                     | Placebo                                | common and classical migraine  | Valquist's criteria, clinical observation                             | Flunarizine: 10.6 (3.25)<br>Placebo: 10.7 (3.29)          | Flunarizine: 58.3<br>Placebo: 54.6            | Italy          | Moderate                        |

**eTable 1a. Demographics and Study Characteristics. Continued.**

| <b>Study ID</b>          | <b>Main Outcome</b>                 | <b>Intervention 1</b>                                                               | <b>Intervention 2</b>      | <b>Intervention 3</b> | <b>Control</b>  | <b>Diagnosis</b>               | <b>Diagnosis criteria</b>   | <b>Mean age per group, years (SD)</b>                                                 | <b>% Female per group</b>                                      | <b>Country</b> | <b>Risk of Bias<sup>a</sup></b> |
|--------------------------|-------------------------------------|-------------------------------------------------------------------------------------|----------------------------|-----------------------|-----------------|--------------------------------|-----------------------------|---------------------------------------------------------------------------------------|----------------------------------------------------------------|----------------|---------------------------------|
| Talebian 2018            | Efficacy<br>Acceptability           | Riboflavin 100mg                                                                    | Riboflavin 200mg           | -                     | Placebo Capsule | migraine with and without aura | ICHD second edition         | Riboflavin 100mg: 8.47 (n.r.)<br>Riboflavin 200mg: 8.97 (n.r.)<br>Placebo: 7.9 (n.r.) | Riboflavin 100mg: 43.3<br>Riboflavin 200mg: 43.3<br>Placebo 50 | Iran           | Low                             |
| Togha 2012               | Efficacy<br>Acceptability<br>Safety | Cinnarizine (6-12years: 37.5mg/day; 12-17 years: 50mg/day in 2 doses)               | Propranolol (1 mg/kg/day)  | -                     | -               | migraine with and without aura | ICHD second edition         | Cinnarizine: 9.8 (2.3)<br>Propranolol: 8.9 (2.7)                                      | Cinnarizine: 33.3<br>Propranolol: 32.1                         | Iran           | Moderate                        |
| Tonekaboni 2013          | Efficacy<br>Acceptability<br>Safety | Topiramate (50-100 mg/day)                                                          | Propranolol (20-80 mg/day) | -                     | -               | migraine                       | ICHD second edition         | Topiramate: 8.5 (2.9)<br>Propranolol: 8.3 (2.8)                                       | Topiramate: 50<br>Propranolol: 52.5                            | Iran           | Moderate                        |
| Winner 2005 <sup>d</sup> | Efficacy<br>Acceptability<br>Safety | Topiramate (15 mg/day [week 1], 30 mg/day [week 2], 50 mg/day [week 3], in 2 doses) | -                          | -                     | Placebo         | migraine with and without aura | ICHD 1997 proposed revision | Topiramate: 11.3 (2.5)<br>Placebo: 10.7 (2.6)                                         | Topiramate: 53.1<br>Placebo: 53.1                              | USA            | Moderate                        |

**eTable 1a. Demographics and Study Characteristics. Continued.**

| <b>Study ID</b>          | <b>Main Outcome</b>                 | <b>Intervention 1</b>                       | <b>Intervention 2</b>                        | <b>Intervention 3</b> | <b>Control</b> | <b>Diagnosis</b>                        | <b>Diagnosis criteria</b> | <b>Mean age per group, years (SD)</b>                                              | <b>% Female per group</b>                                 | <b>Country</b> | <b>Risk of Bias<sup>a</sup></b> |
|--------------------------|-------------------------------------|---------------------------------------------|----------------------------------------------|-----------------------|----------------|-----------------------------------------|---------------------------|------------------------------------------------------------------------------------|-----------------------------------------------------------|----------------|---------------------------------|
| Powers 2017 <sup>d</sup> | Efficacy<br>Acceptability<br>Safety | Amitriptylin<br>(1 mg/kg/day<br>in 2 doses) | Topiramate<br>(2<br>mg/kg/day in<br>2 doses) | -                     | Placebo        | migraine<br>with and<br>without<br>aura | ICHD<br>second<br>edition | Amitriptylin:<br>14.2 (2.4)<br>Topiramate:<br>14.2 (2.5)<br>Placebo: 14.2<br>(2.5) | Amitriptylin: 67<br>Topiramate:<br>69.7<br>Placebo: 68.06 | USA            | Low                             |

Note. *ICHD* = International Classification of Headache Disorders

<sup>a</sup> Based on adequacy of random sequence generation, allocation concealment, blinding of participants and personnel, blinding of outcome assessment, usage of observer-rated outcomes, completeness of outcome data, specification of main outcomes a priori, reporting on all outcomes, and conduction of ITT-analyses. Individual items were summarized to produce a total score of 1 (low risk of bias), 2 (moderate/unclear risk of bias), or 3 (high risk of bias).

<sup>b</sup> This study did not report efficacy data in a usable way (i.e., no baseline data reported).

<sup>c</sup> This study did report efficacy data; however, the study was unconnected to the efficacy network.

<sup>d</sup> These studies reported long-term outcomes and were not included in the main analysis but only in the long-term analysis

**eTable 1b. Study design and outcomes**

| Study ID              | Number of study sites | Study design | Treatment duration                            | Co-intervention | Randomized per group                                   | Dichotomous outcome                                                  |                        | Continuous outcome                                                                                    |                        |
|-----------------------|-----------------------|--------------|-----------------------------------------------|-----------------|--------------------------------------------------------|----------------------------------------------------------------------|------------------------|-------------------------------------------------------------------------------------------------------|------------------------|
|                       |                       |              |                                               |                 |                                                        | Responder criterion                                                  | Reported time point(s) | Types of outcome                                                                                      | Reported time point(s) |
| Apostol 2008          | 38                    | Parallel     | 10 weeks plus 2 weeks titration               | No              | 250 mg: 83<br>500 mg: 74<br>1000 mg: 75<br>Placebo: 73 | ≥50% reduction in migraine frequency within 4 weeks                  | 2-4 months             | Migraine frequency within 3 months prior to screening                                                 | 2-4 months             |
| Ashrafi 2005          | n.r.                  | Parallel     | ≥ 12 weeks                                    | No              | Sodium Valporate: 60<br>Propranolol: 60                | ≥ 50% reduction of baseline headache frequency per month             | up to 2 months         | Headache frequency                                                                                    | 2-4 months             |
| Ashrafi 2014          | 1                     | Parallel     | 12 weeks                                      | No              | Cinnarizine: 34<br>Placebo: 34                         | ≥50% reduction of baseline headache frequency per month              | 2-4 months             | Headache frequency per month                                                                          | 2-4 months             |
| Bakhshandeh Bali 2015 | 1                     | Parallel     | at least 8 weeks                              | Yes             | Pregabalin: 46<br>Propranolol: 45                      | ≥50% reduction of severity and frequency of headache per month       | up to 2 months         | Headache frequency per month                                                                          | up to 2 months         |
| Battistella 1990      | n.r.                  | Crossover    | 12 weeks, 4 weeks washout crossover, 12 weeks | No              | Nimodipine: 18<br>Placebo: 19                          | n.r.                                                                 | n.r.                   | Headache frequency (attacks per month)                                                                | 2-4 months             |
| Bidabadi 2010         | 1                     | Parallel     | 4 to 6 months                                 | No              | Propranolol: 32<br>Sodium Valpoate: 31                 | Headache frequency: Reduction of baseline headache frequency by >50% | 2-4 months             | Headache frequency per month                                                                          | 2-4 months             |
| Bruijn 2010           | 2                     | Crossover    | 16 weeks, 4 weeks washout, 16 weeks           | Yes             | Riboflavin: 20<br>Placebo: 22                          | n.r.                                                                 | n.r.                   | Mean frequency of migraine attacks in the last 4 weeks at the end of the riboflavin and placebo phase | 2-4 months             |
|                       |                       |              |                                               |                 |                                                        |                                                                      |                        |                                                                                                       |                        |



**eTable 1b. Study design and outcomes. Continued.**

| Study ID        | Number of study sites | Study design | Treatment duration                                   | Co-intervention | Randomized per group                                       | Dichotomous outcome                                                                                                                                                      |                        | Continuous outcome                                    |                        |
|-----------------|-----------------------|--------------|------------------------------------------------------|-----------------|------------------------------------------------------------|--------------------------------------------------------------------------------------------------------------------------------------------------------------------------|------------------------|-------------------------------------------------------|------------------------|
|                 |                       |              |                                                      |                 |                                                            | Responder criterion                                                                                                                                                      | Reported time point(s) | Types of outcome                                      | Reported time point(s) |
| Fallah 2013     | 1                     | Parallel     | 3 months                                             | No              | Topiramate: 50<br>Propranolol: 50                          | ≥50% reduction in monthly headache frequency                                                                                                                             | 2-4 months             | Headache frequency monthly                            | 2-4 months             |
| Fallah 2018     | 1                     | Parallel     | 12 weeks                                             | No              | Melatonin: 45<br>Amitriptylin: 46                          | More than 50% decrease in monthly headache frequency during the follow-up period                                                                                         | n.r.                   | Monthly headache frequency                            | n.r.                   |
| Gelfand 2017    | 1                     | Parallel     | 12 weeks                                             | Yes             | Melatonin: 13<br>Placebo: 13                               | n.r.                                                                                                                                                                     | n.r.                   | Mean migraine days                                    | 2-4 months             |
| Lakshmi 2007    | 1                     | Parallel     | 12 weeks                                             | No              | Topiramate: 22<br>Placebo: 22                              | ≥50% reduction in monthly migraine days                                                                                                                                  | 2-4 months             | Migraine frequency                                    | 2-4 months             |
| Lewis 2009      | 31                    | Parallel     | 4 weeks titration and 12 weeks maintenance           | No              | Topiramate 50mg: 35<br>Topiramate 100mg: 35<br>Placebo: 33 | ≥50% reduction in the monthly migraine attack rate (48-hour-rule: a single migraine episode defined as all recurrences of migraine symptoms within 48 hours after onset) | 2-4 months             | Migraine attacks per month                            | 2-4 months             |
| Ludvigsson 1974 | n.r.                  | Crossover    | 2 x13 weeks including titration phase of 1 week each | No              | Propranolol: 16<br>Placebo: 16                             | Headache frequency reduction responder (66,6% reduction)                                                                                                                 | 2-4 months             | Frequency of headache attacks during a 3-month period | 2-4 months             |
| MacLennan 2008  | 1                     | Parallel     | 12 weeks                                             | No              | Riboflavin: 27<br>Placebo: 21                              | ≥50% reduction in the number of migraine attacks per 4 weeks at the end of the study period, compared with the baseline month                                            | up to 2 months         | Migraine frequency per month                          | n.r.                   |

**eTable 1b. Study design and outcomes.** Continued.

| Study ID        | Number of study sites | Study design | Treatment duration | Co-intervention | Randomized per group                                        | Dichotomous outcome                                           |                               | Continuous outcome                        |                               |
|-----------------|-----------------------|--------------|--------------------|-----------------|-------------------------------------------------------------|---------------------------------------------------------------|-------------------------------|-------------------------------------------|-------------------------------|
|                 |                       |              |                    |                 |                                                             | Responder criterion                                           | Reported time point(s)        | Types of outcome                          | Reported time point(s)        |
| Oelkers 2008    | 1                     | Parallel     | 12 weeks           | Yes             | Butterbur root extract: 20<br>Placebo: 19                   | ≥50% reduction of headache frequency compared with baseline   | n.r.                          | Attack frequency per 28 days              | Up to 2 months and 5-6 months |
| Santucci 1986   | n.r.                  | Crossover    | 4 weeks            | No              | n.r.                                                        | n.r.                                                          | n.r.                          | Frequency of migraine attacks per 4 weeks | 2-4 months                    |
| Slater 2011     | 1                     | Crossover    | 2 x16 weeks        | No              | CoEnzyme Q10: 60<br>Placebo: 60                             | CoEnzyme Q10: Migraine episodes -50% or more<br>Placebo: n.r. | n.r.                          | Headache frequency                        | Up to 2 months and 2-4 months |
| Sorge 1985      | 1                     | Parallel     | 12 weeks           | No              | Flunarizine: 24<br>Placebo: 24                              | >50% reduction in migraine frequency                          | n.r.                          | Headache frequency                        | 2-4 months                    |
| Talebian 2018   | 1                     | Parallel     | 12 weeks           | No              | Riboflavin 100mg: 30<br>Riboflavin 200mg: 30<br>Placebo: 30 | ≥50% reduction in headache days                               | 2-4 months                    | Frequency of migraine attacks             | 2-4 months                    |
| Togha 2012      | 3                     | Parallel     | 12 weeks           | No              | Cinnarizine: 60<br>Propranolol: 60                          | ≥ 50% reduction of baseline headache frequency per month      | Up to 2 months and 2-4 months | Migraine frequency attacks per month      | 2-4 months                    |
| Tonekaboni 2013 | 1                     | Parallel     | 4weeks/16weeks     | No              | Topiramate: 44<br>Propranolol: 42                           | n.r.                                                          | n.r.                          | Frequency, average number of headaches    | up to 2 months and 2-4 months |

**eTable 1b. Study design and outcomes. Continued.**

| Study ID     | Number of study sites | Study design | Treatment duration                                        | Co-intervention | Randomized per group                                | Dichotomous outcome                                             |                        | Continuous outcome                 |                        |
|--------------|-----------------------|--------------|-----------------------------------------------------------|-----------------|-----------------------------------------------------|-----------------------------------------------------------------|------------------------|------------------------------------|------------------------|
|              |                       |              |                                                           |                 |                                                     | Responder criterion                                             | Reported time point(s) | Types of outcome                   | Reported time point(s) |
| Powers 2017* | 31                    | Crossover    | 12 weeks                                                  | unclear         | Amitriptylin: 144<br>Topiramate: 145<br>Placebo: 72 | ≥50%reduction in number of headache days compared with baseline | 4-6 months             | Headache days per 28 days          | 4-6 months             |
| Winner 2005* | 17                    | Parallel     | 8 weeks titration (increasing dose), 12 weeks maintenance | No              | Topiramate: 112<br>Placebo: 50                      | >50% baseline vs. last 28 days                                  | 4-6 months             | Number of migraine days per months | 4-6 months             |

\* These studies reported long-term outcomes and were not included in the main analysis but only in the long-term analysis

**eTable 2a. Head-to-head comparisons of efficacy of the included prophylactic treatments**

|                                    | [1]                 | [2]                 | [3]                 | [4]                | [5]                 | [6]                 | [7]                  | [8]                | [9]                  | [10]                | [11]                | [12]                |
|------------------------------------|---------------------|---------------------|---------------------|--------------------|---------------------|---------------------|----------------------|--------------------|----------------------|---------------------|---------------------|---------------------|
| Butterbur root extract [1]         |                     |                     |                     |                    |                     |                     | 0.00 [-1.15; 1.15]   |                    |                      |                     |                     |                     |
| Cinnarizine [2]                    | -0.52 [-1.88; 0.85] |                     |                     |                    |                     |                     | 0.23 [-0.74; 1.20]   |                    | 0.17 [-0.74; 1.08]   |                     |                     |                     |
| CoEnzyme Q10 [3]                   | -0.30 [-1.76; 1.17] | 0.22 [-0.94; 1.38]  |                     |                    |                     |                     | 0.30 [-0.61; 1.21]   |                    |                      |                     |                     |                     |
| Flunarizine [4]                    | -0.93 [-2.49; 0.63] | -0.41 [-1.69; 0.87] | -0.63 [-2.02; 0.75] |                    |                     |                     | 0.93 [-0.12; 1.98]   |                    |                      |                     |                     |                     |
| L-5-Hydroxytryptophan (L-5HTP) [5] | 0.21 [-1.45; 1.87]  | 0.73 [-0.68; 2.13]  | 0.51 [-1.00; 2.01]  | 1.14 [-0.45; 2.73] |                     |                     | -0.21 [-1.40; 0.99]  |                    |                      |                     |                     |                     |
| Nimodipine [6]                     | -0.00 [-1.56; 1.56] | 0.52 [-0.76; 1.80]  | 0.30 [-1.09; 1.69]  | 0.93 [-0.55; 2.42] | -0.21 [-1.80; 1.39] |                     | 0.00 [-1.05; 1.05]   |                    |                      |                     |                     |                     |
| Placebo [7]                        | -0.00 [-1.15; 1.15] | 0.52 [-0.21; 1.25]  | 0.30 [-0.61; 1.21]  | 0.93 [-0.12; 1.98] | -0.21 [-1.40; 0.99] | -0.00 [-1.05; 1.05] |                      |                    | -1.51 [-2.81; -0.20] | -0.19 [-0.78; 0.39] | -0.10 [-0.98; 0.77] | -0.55 [-1.25; 0.14] |
| Pregabalin [8]                     | -0.81 [-2.40; 0.77] | -0.30 [-1.47; 0.88] | -0.52 [-1.93; 0.90] | 0.12 [-1.40; 1.63] | -1.02 [-2.64; 0.60] | -0.81 [-2.33; 0.70] | -0.81 [-1.90; 0.28]  |                    | 0.21 [-0.72; 1.14]   |                     |                     |                     |
| Propranolol [9]                    | -0.60 [-1.89; 0.68] | -0.08 [-0.80; 0.63] | -0.30 [-1.37; 0.77] | 0.33 [-0.86; 1.52] | -0.81 [-2.13; 0.52] | -0.60 [-1.80; 0.60] | -0.60 [-1.17; -0.03] | 0.21 [-0.72; 1.14] |                      |                     | 0.32 [-0.35; 0.98]  | -0.02 [-0.68; 0.63] |

**eTable 2a. Head-to-head comparisons of efficacy of the included prophylactic treatments. Continued.**

|                       | [1]                        | [2]                        | [3]                        | [4]                       | [5]                        | [6]                        | [7]                          | [8]                       | [9]                       | [10]                       | [11]                       | [12] |
|-----------------------|----------------------------|----------------------------|----------------------------|---------------------------|----------------------------|----------------------------|------------------------------|---------------------------|---------------------------|----------------------------|----------------------------|------|
| Riboflavin [10]       | -0.19 [-<br>1.49;<br>1.10] | 0.32 [-<br>0.61;<br>1.26]  | 0.10 [-<br>0.97;<br>1.18]  | 0.74 [-<br>0.46;<br>1.94] | -0.40 [-<br>1.73;<br>0.93] | -0.19 [-<br>1.40;<br>1.01] | -0.19 [-<br>0.78;<br>0.39]   | 0.62 [-<br>0.62;<br>1.86] | 0.41 [-<br>0.41;<br>1.22] |                            |                            |      |
| Sodium Valproate [11] | -0.22 [-<br>1.54;<br>1.10] | 0.30 [-<br>0.55;<br>1.15]  | 0.08 [-<br>1.03;<br>1.19]  | 0.71 [-<br>0.52;<br>1.94] | -0.42 [-<br>1.78;<br>0.93] | -0.22 [-<br>1.45;<br>1.01] | -0.22 [-<br>0.86;<br>0.42]   | 0.60 [-<br>0.49;<br>1.69] | 0.38 [-<br>0.19;<br>0.95] | -0.02 [-<br>0.89;<br>0.84] |                            |      |
| Topiramate [12]       | -0.59 [-<br>1.87;<br>0.69] | -0.07 [-<br>0.89;<br>0.75] | -0.29 [-<br>1.36;<br>0.78] | 0.34 [-<br>0.85;<br>1.53] | -0.80 [-<br>2.12;<br>0.52] | -0.59 [-<br>1.78;<br>0.60] | -0.59 [-<br>1.15; -<br>0.03] | 0.22 [-<br>0.85;<br>1.30] | 0.01 [-<br>0.54;<br>0.56] | -0.40 [-<br>1.21;<br>0.42] | -0.37 [-<br>1.09;<br>0.34] |      |

Note: Column headers are identical to row headers and are indicated by the number in the respective square brackets.

Cells contain the network estimates (SMDs) from network meta-analysis in the lower triangle and the direct treatment estimates (SMDs) from pairwise comparisons in the upper triangle.

**eTable 2b. Head-to-head comparisons of acceptability of the included prophylactic treatments**

|                            | [1]                      | [2]                      | [3]                      | [4]                      | [5]                      | [6]                     | [7]                     | [8]                      | [9] | [10]                    | [11]                    | [12]                    | [13]                    |
|----------------------------|--------------------------|--------------------------|--------------------------|--------------------------|--------------------------|-------------------------|-------------------------|--------------------------|-----|-------------------------|-------------------------|-------------------------|-------------------------|
| Amitriptylin [1]           |                          |                          |                          |                          |                          | 1.17<br>[0.39;<br>3.57] |                         |                          |     |                         |                         |                         |                         |
| Butterbur root extract [2] | 0.62<br>[0.02;<br>25.02] |                          |                          |                          |                          |                         |                         | 0.95<br>[0.06;<br>14.13] |     |                         |                         |                         |                         |
| Cinnarizine [3]            | 0.52<br>[0.03;<br>8.60]  | 0.84<br>[0.04;<br>16.20] |                          |                          |                          |                         |                         | 2.00<br>[0.39;<br>10.20] |     | 0.75<br>[0.18;<br>3.21] |                         |                         |                         |
| CoEnzyme Q10 [4]           | 0.70<br>[0.05;<br>8.98]  | 1.13<br>[0.07;<br>17.17] | 1.35<br>[0.37;<br>4.84]  |                          |                          |                         |                         | 0.84<br>[0.58;<br>1.22]  |     |                         |                         |                         |                         |
| Flunarizine [5]            | 0.59<br>[0.03;<br>11.12] | 0.95<br>[0.04;<br>20.82] | 1.14<br>[0.16;<br>7.87]  | 0.84<br>[0.18;<br>3.94]  |                          |                         |                         | 1.00<br>[0.22;<br>4.47]  |     |                         |                         |                         |                         |
| Melatonin [6]              | 1.17<br>[0.39;<br>3.57]  | 1.90<br>[0.06;<br>64.83] | 2.27<br>[0.17;<br>30.11] | 1.69<br>[0.17;<br>16.89] | 2.00<br>[0.13;<br>30.44] |                         |                         | 0.50<br>[0.05;<br>4.86]  |     |                         |                         |                         |                         |
| Nimodipine [7]             | 0.74<br>[0.04;<br>13.07] | 1.20<br>[0.06;<br>24.56] | 1.44<br>[0.23;<br>8.90]  | 1.07<br>[0.26;<br>4.32]  | 1.26<br>[0.17;<br>9.49]  | 0.63<br>[0.04;<br>8.90] |                         | 0.79<br>[0.21;<br>3.06]  |     |                         |                         |                         |                         |
| Placebo [8]                | 0.59<br>[0.05;<br>7.38]  | 0.95<br>[0.06;<br>14.13] | 1.14<br>[0.33;<br>3.87]  | 0.84<br>[0.58;<br>1.22]  | 1.00<br>[0.22;<br>4.47]  | 0.50<br>[0.05;<br>4.86] | 0.79<br>[0.21;<br>3.06] |                          |     |                         | 2.03<br>[0.51;<br>8.12] | 0.58<br>[0.25;<br>1.32] | 1.31<br>[0.58;<br>2.96] |
| Pregabalin [9]             | 0.62<br>[0.04;<br>10.97] | 1.00<br>[0.05;<br>20.61] | 1.20<br>[0.28;<br>5.25]  | 0.89<br>[0.22;<br>3.64]  | 1.06<br>[0.14;<br>7.97]  | 0.53<br>[0.04;<br>7.46] | 0.84<br>[0.12;<br>5.68] | 1.06<br>[0.27;<br>4.10]  |     | 0.98<br>[0.40;<br>2.38] |                         |                         |                         |

**eTable 2b. Head-to-head comparisons of acceptability of the included prophylactic treatments. Continued.**

|                       | [1]                      | [2]                      | [3]                      | [4]                     | [5]                      | [6]                      | [7]                      | [8]                     | [9]                      | [10]                     | [11]                    | [12]                    | [13]                    |
|-----------------------|--------------------------|--------------------------|--------------------------|-------------------------|--------------------------|--------------------------|--------------------------|-------------------------|--------------------------|--------------------------|-------------------------|-------------------------|-------------------------|
| Propranolol [10]      | 0.61<br>[0.04;<br>9.32]  | 0.98<br>[0.05;<br>17.63] | 1.18<br>[0.36;<br>3.81]  | 0.87<br>[0.29;<br>2.59] | 1.03<br>[0.17;<br>6.34]  | 0.52<br>[0.04;<br>6.26]  | 0.82<br>[0.15;<br>4.46]  | 1.03<br>[0.37;<br>2.88] | 0.98<br>[0.40;<br>2.38]  |                          |                         | 0.98<br>[0.24;<br>3.98] | 0.40<br>[0.10;<br>1.69] |
| Riboflavin [11]       | 1.19<br>[0.07;<br>21.37] | 1.93<br>[0.09;<br>40.12] | 2.31<br>[0.36;<br>14.68] | 1.71<br>[0.41;<br>7.18] | 2.03<br>[0.26;<br>15.62] | 1.02<br>[0.07;<br>14.56] | 1.61<br>[0.23;<br>11.13] | 2.03<br>[0.51;<br>8.12] | 1.92<br>[0.28;<br>13.36] | 1.96<br>[0.35;<br>11.00] |                         |                         |                         |
| Sodium Valproate [12] | 0.39<br>[0.03;<br>5.51]  | 0.63<br>[0.04;<br>10.48] | 0.76<br>[0.20;<br>2.88]  | 0.56<br>[0.24;<br>1.31] | 0.67<br>[0.12;<br>3.58]  | 0.33<br>[0.03;<br>3.67]  | 0.53<br>[0.11;<br>2.49]  | 0.67<br>[0.31;<br>1.43] | 0.63<br>[0.16;<br>2.49]  | 0.65<br>[0.23;<br>1.83]  | 0.33<br>[0.07;<br>1.60] |                         |                         |
| Topiramate [13]       | 0.58<br>[0.04;<br>8.18]  | 0.94<br>[0.06;<br>15.55] | 1.13<br>[0.30;<br>4.29]  | 0.84<br>[0.36;<br>1.93] | 0.99<br>[0.19;<br>5.30]  | 0.50<br>[0.05;<br>5.45]  | 0.79<br>[0.17;<br>3.69]  | 0.99<br>[0.47;<br>2.10] | 0.94<br>[0.24;<br>3.72]  | 0.96<br>[0.34;<br>2.75]  | 0.49<br>[0.10;<br>2.36] | 1.49<br>[0.54;<br>4.07] |                         |

Note: Column headers are identical to row headers and are indicated by the number in the respective square brackets.

Cells contain the network estimates (RRs) from network meta-analysis in the lower triangle and the direct treatment estimates (RRs) from pairwise comparisons in the upper triangle.

Shaded Area = Direct Comparisons

**eTable 2c. Head-to-head comparisons of safety of the included prophylactic treatments**

|                        | Butterbur root extract | Cinnarizine         | Flunarizine          | Nimodipine          | Placebo             | Propranolol         | Riboflavin         | Sodium Valproate   | Topiramate        |
|------------------------|------------------------|---------------------|----------------------|---------------------|---------------------|---------------------|--------------------|--------------------|-------------------|
| Butterbur root extract |                        |                     |                      |                     | 0.95 [0.02; 45.63]  |                     |                    |                    |                   |
| Cinnarizine            | 0.54 [0.00; 201.21]    |                     |                      |                     |                     | 1.00 [0.02; 49.59]  |                    |                    |                   |
| Flunarizine            | 0.14 [0.00; 17.23]     | 0.25 [0.00; 52.10]  |                      |                     | 7.00 [0.38; 128.47] |                     |                    |                    |                   |
| Nimodipine             | 0.90 [0.00; 214.72]    | 1.66 [0.00; 616.22] | 6.64 [0.05; 840.10]  |                     | 1.05 [0.02; 50.43]  |                     |                    |                    |                   |
| Placebo                | 0.95 [0.02; 45.63]     | 1.75 [0.02; 153.87] | 7.00 [0.38; 128.47]  | 1.05 [0.02; 50.43]  |                     |                     | 1.28 [0.03; 61.88] | 0.35 [0.05; 2.74]  | 0.35 [0.04; 2.82] |
| Propranolol            | 0.54 [0.01; 46.23]     | 1.00 [0.02; 49.59]  | 3.99 [0.10; 151.99]  | 0.60 [0.01; 51.11]  | 0.57 [0.06; 5.08]   |                     |                    | 0.98 [0.06; 15.48] | 0.45 [0.07; 3.12] |
| Riboflavin             | 1.22 [0.01; 291.78]    | 2.24 [0.01; 836.87] | 8.95 [0.07; 1142.76] | 1.35 [0.01; 322.72] | 1.28 [0.03; 61.88]  | 2.24 [0.03; 192.64] |                    |                    |                   |
| Sodium Valproate       | 0.40 [0.01; 28.53]     | 0.73 [0.01; 63.41]  | 2.92 [0.09; 90.18]   | 0.44 [0.01; 31.54]  | 0.42 [0.07; 2.57]   | 0.73 [0.08; 6.36]   | 0.33 [0.00; 23.63] |                    |                   |
| Topiramate             | 0.28 [0.00; 20.59]     | 0.52 [0.01; 37.59]  | 2.09 [0.07; 65.21]   | 0.31 [0.00; 22.77]  | 0.30 [0.05; 1.87]   | 0.52 [0.09; 2.98]   | 0.23 [0.00; 17.06] | 0.72 [0.08; 6.49]  |                   |

Cells contain the network estimates (RRs) from network meta-analysis in the lower triangle and the direct treatment estimates (RRs) from pairwise comparisons in the upper triangle. Shaded Area = Direct Comparisons



**eTable 3a. Head-to-head comparisons of long-term efficacy of the included prophylactic treatments**

|                                    | [1]                 | [2]                 | [3]                 | [4]                 | [5]                | [6]                 | [7]                 | [8]                 | [9] | [10]                 | [11]                | [12]                | [13]                |
|------------------------------------|---------------------|---------------------|---------------------|---------------------|--------------------|---------------------|---------------------|---------------------|-----|----------------------|---------------------|---------------------|---------------------|
| Amitriptylin [1]                   |                     |                     |                     |                     |                    |                     |                     | 0.14 [-0.72; 1.00]  |     |                      |                     |                     | 0.00 [-0.84; 0.84]  |
| Butterbur root extract [2]         | 0.22 [-1.15; 1.59]  |                     |                     |                     |                    |                     |                     | 0.00 [-1.13; 1.13]  |     |                      |                     |                     |                     |
| Cinnarizine [3]                    | -0.21 [-1.23; 0.80] | -0.43 [-1.77; 0.90] |                     |                     |                    |                     |                     | 0.23 [-0.72; 1.18]  |     | 0.17 [-0.72; 1.06]   |                     |                     |                     |
| CoEnzyme Q10 [4]                   | -0.08 [-1.25; 1.09] | -0.30 [-1.73; 1.14] | 0.13 [-1.00; 1.26]  |                     |                    |                     |                     | 0.30 [-0.58; 1.18]  |     |                      |                     |                     |                     |
| Flunarizine [5]                    | -0.71 [-1.99; 0.57] | -0.93 [-2.46; 0.60] | -0.50 [-1.75; 0.75] | -0.63 [-1.99; 0.72] |                    |                     |                     | 0.93 [-0.10; 1.96]  |     |                      |                     |                     |                     |
| L-5-Hydroxytryptophan (L-5HTP) [6] | 0.43 [-0.98; 1.83]  | 0.21 [-1.43; 1.84]  | 0.64 [-0.73; 2.01]  | 0.51 [-0.97; 1.98]  | 1.14 [-0.43; 2.70] |                     |                     | -0.21 [-1.38; 0.97] |     |                      |                     |                     |                     |
| Nimodipine [7]                     | -0.24 [-1.53; 1.05] | -0.46 [-1.99; 1.08] | -0.03 [-1.28; 1.23] | -0.16 [-1.52; 1.20] | 0.47 [-0.99; 1.94] | -0.66 [-2.24; 0.91] |                     | 0.46 [-0.58; 1.50]  |     |                      |                     |                     |                     |
| Placebo [8]                        | 0.22 [-0.54; 0.98]  | 0.00 [-1.13; 1.13]  | 0.43 [-0.27; 1.14]  | 0.30 [-0.58; 1.18]  | 0.93 [-0.10; 1.96] | -0.21 [-1.38; 0.97] | 0.46 [-0.58; 1.50]  |                     |     | -1.51 [-2.79; -0.22] | -0.20 [-0.77; 0.37] | -0.10 [-0.95; 0.75] | -0.21 [-0.66; 0.24] |
| Pregabalin [9]                     | -0.43 [-1.69; 0.83] | -0.65 [-2.19; 0.89] | -0.22 [-1.36; 0.92] | -0.35 [-1.72; 1.02] | 0.28 [-1.18; 1.75] | -0.86 [-2.43; 0.72] | -0.19 [-1.66; 1.28] | -0.65 [-1.69; 0.39] |     | 0.21 [-0.69; 1.12]   |                     |                     |                     |

**eTable 3a. Head-to-head comparisons of long-term efficacy of the included prophylactic treatments. Continued.**

|                       | [1]                 | [2]                 | [3]                 | [4]                 | [5]                | [6]                 | [7]                | [8]                 | [9]                | [10]               | [11]                | [12]                | [13]                |
|-----------------------|---------------------|---------------------|---------------------|---------------------|--------------------|---------------------|--------------------|---------------------|--------------------|--------------------|---------------------|---------------------|---------------------|
| Propranolol [10]      | -0.22 [-1.09; 0.65] | -0.44 [-1.68; 0.81] | -0.01 [-0.70; 0.69] | -0.14 [-1.16; 0.89] | 0.49 [-0.66; 1.65] | -0.64 [-1.93; 0.64] | 0.02 [-1.14; 1.18] | -0.44 [-0.96; 0.08] | 0.21 [-0.69; 1.12] |                    |                     | 0.32 [-0.34; 0.97]  | -0.02 [-0.66; 0.62] |
| Riboflavin [11]       | 0.02 [-0.93; 0.98]  | -0.20 [-1.47; 1.07] | 0.23 [-0.67; 1.14]  | 0.10 [-0.95; 1.15]  | 0.73 [-0.44; 1.91] | -0.40 [-1.71; 0.90] | 0.26 [-0.92; 1.45] | -0.20 [-0.77; 0.37] | 0.45 [-0.74; 1.64] | 0.24 [-0.53; 1.01] |                     |                     |                     |
| Sodium Valproate [12] | 0.11 [-0.84; 1.05]  | -0.11 [-1.40; 1.17] | 0.32 [-0.51; 1.15]  | 0.18 [-0.89; 1.26]  | 0.82 [-0.38; 2.01] | -0.32 [-1.65; 1.01] | 0.34 [-0.86; 1.55] | -0.11 [-0.73; 0.50] | 0.54 [-0.52; 1.60] | 0.32 [-0.23; 0.87] | 0.08 [-0.75; 0.92]  |                     |                     |
| Topiramate [13]       | -0.07 [-0.83; 0.69] | -0.29 [-1.50; 0.91] | 0.14 [-0.62; 0.89]  | 0.00 [-0.97; 0.98]  | 0.64 [-0.47; 1.75] | -0.50 [-1.75; 0.75] | 0.16 [-0.95; 1.28] | -0.29 [-0.70; 0.12] | 0.36 [-0.68; 1.39] | 0.14 [-0.36; 0.65] | -0.10 [-0.80; 0.61] | -0.18 [-0.83; 0.47] |                     |

Note: Column headers are identical to row headers and are indicated by the number in the respective square brackets.

Cells contain the network estimates (SMDs) from network meta-analysis in the lower triangle and the direct treatment estimates (SMDs) from pairwise comparisons in the upper triangle.

Shaded Area = Direct Comparisons

**eTable 3b. Head-to-head comparisons of long-term acceptability of the included prophylactic treatments**

|                            | [1]                      | [2]                      | [3]                     | [4]                     | [5]                     | [6]                     | [7]                     | [8]                      | [9] | [10]                    | [11]                    | [12]                    | [13]                    |
|----------------------------|--------------------------|--------------------------|-------------------------|-------------------------|-------------------------|-------------------------|-------------------------|--------------------------|-----|-------------------------|-------------------------|-------------------------|-------------------------|
| Amitriptylin [1]           |                          |                          |                         |                         |                         | 1.17<br>[0.39;<br>3.57] |                         | 1.46<br>[0.83;<br>2.57]  |     |                         |                         |                         | 0.89<br>[0.61;<br>1.29] |
| Butterbur root extract [2] | 1.29<br>[0.08;<br>19.92] |                          |                         |                         |                         |                         |                         | 0.95<br>[0.06;<br>14.13] |     |                         |                         |                         |                         |
| Cinnarizine [3]            | 1.00<br>[0.28;<br>3.59]  | 0.78<br>[0.04;<br>15.01] |                         |                         |                         |                         |                         | 2.00<br>[0.39;<br>10.20] |     | 0.75<br>[0.18;<br>3.21] |                         |                         |                         |
| CoEnzyme Q10 [4]           | 1.45<br>[0.81;<br>2.60]  | 1.13<br>[0.07;<br>17.17] | 1.45<br>[0.41;<br>5.15] |                         |                         |                         |                         | 0.84<br>[0.58;<br>1.22]  |     |                         |                         |                         |                         |
| Flunarizine [5]            | 1.22<br>[0.26;<br>5.85]  | 0.95<br>[0.04;<br>20.82] | 1.22<br>[0.18;<br>8.40] | 0.84<br>[0.18;<br>3.94] |                         |                         |                         | 1.00<br>[0.22;<br>4.47]  |     |                         |                         |                         |                         |
| Melatonin [6]              | 1.35<br>[0.50;<br>3.69]  | 1.05<br>[0.06;<br>19.13] | 1.35<br>[0.27;<br>6.70] | 0.93<br>[0.30;<br>2.88] | 1.11<br>[0.18;<br>6.94] |                         |                         | 0.50<br>[0.05;<br>4.86]  |     |                         |                         |                         |                         |
| Nimodipine [7]             | 1.55<br>[0.37;<br>6.44]  | 1.20<br>[0.06;<br>24.56] | 1.54<br>[0.25;<br>9.49] | 1.07<br>[0.26;<br>4.32] | 1.26<br>[0.17;<br>9.49] | 1.14<br>[0.20;<br>6.39] |                         | 0.79<br>[0.21;<br>3.06]  |     |                         |                         |                         |                         |
| Placebo [8]                | 1.22<br>[0.78;<br>1.93]  | 0.95<br>[0.06;<br>14.13] | 1.22<br>[0.36;<br>4.12] | 0.84<br>[0.58;<br>1.22] | 1.00<br>[0.22;<br>4.47] | 0.90<br>[0.31;<br>2.63] | 0.79<br>[0.21;<br>3.06] |                          |     |                         | 2.03<br>[0.51;<br>8.12] | 0.58<br>[0.25;<br>1.32] | 0.78<br>[0.53;<br>1.14] |
| Pregabalin [9]             | 1.14<br>[0.29;<br>4.45]  | 0.88<br>[0.04;<br>17.86] | 1.13<br>[0.26;<br>4.93] | 0.78<br>[0.20;<br>3.10] | 0.93<br>[0.13;<br>6.86] | 0.84<br>[0.16;<br>4.49] | 0.74<br>[0.11;<br>4.88] | 0.93<br>[0.25;<br>3.49]  |     | 0.98<br>[0.40;<br>2.38] |                         |                         |                         |

**eTable 3b. Head-to-head comparisons of long-term acceptability of the included prophylactic treatments. Continued.**

|                       | [1]                      | [2]                      | [3]                      | [4]                     | [5]                      | [6]                      | [7]                      | [8]                     | [9]                      | [10]                     | [11]                    | [12]                    | [13]                    |
|-----------------------|--------------------------|--------------------------|--------------------------|-------------------------|--------------------------|--------------------------|--------------------------|-------------------------|--------------------------|--------------------------|-------------------------|-------------------------|-------------------------|
| Propranolol [10]      | 1.11<br>[0.40;<br>3.13]  | 0.86<br>[0.05;<br>15.27] | 1.11<br>[0.35;<br>3.57]  | 0.77<br>[0.27;<br>2.19] | 0.91<br>[0.15;<br>5.44]  | 0.82<br>[0.20;<br>3.40]  | 0.72<br>[0.14;<br>3.82]  | 0.91<br>[0.34;<br>2.42] | 0.98<br>[0.40;<br>2.38]  |                          |                         | 0.98<br>[0.24;<br>3.98] | 0.40<br>[0.10;<br>1.69] |
| Riboflavin [11]       | 2.49<br>[0.58;<br>10.69] | 1.93<br>[0.09;<br>40.12] | 2.48<br>[0.39;<br>15.66] | 1.71<br>[0.41;<br>7.18] | 2.03<br>[0.26;<br>15.62] | 1.84<br>[0.32;<br>10.55] | 1.61<br>[0.23;<br>11.13] | 2.03<br>[0.51;<br>8.12] | 2.19<br>[0.32;<br>14.86] | 2.23<br>[0.41;<br>12.21] |                         |                         |                         |
| Sodium Valproate [12] | 0.79<br>[0.33;<br>1.89]  | 0.61<br>[0.04;<br>10.13] | 0.79<br>[0.21;<br>2.99]  | 0.54<br>[0.23;<br>1.26] | 0.65<br>[0.12;<br>3.46]  | 0.58<br>[0.16;<br>2.14]  | 0.51<br>[0.11;<br>2.41]  | 0.65<br>[0.30;<br>1.38] | 0.69<br>[0.18;<br>2.69]  | 0.71<br>[0.26;<br>1.97]  | 0.32<br>[0.07;<br>1.54] |                         |                         |
| Topiramate [13]       | 0.92<br>[0.64;<br>1.31]  | 0.71<br>[0.05;<br>10.85] | 0.91<br>[0.26;<br>3.17]  | 0.63<br>[0.37;<br>1.07] | 0.75<br>[0.16;<br>3.50]  | 0.68<br>[0.24;<br>1.93]  | 0.59<br>[0.15;<br>2.41]  | 0.75<br>[0.51;<br>1.09] | 0.80<br>[0.21;<br>3.04]  | 0.82<br>[0.31;<br>2.21]  | 0.37<br>[0.09;<br>1.55] | 1.16<br>[0.51;<br>2.65] |                         |

Note: Column headers are identical to row headers and are indicated by the number in the respective square brackets.

Cells contain the network estimates (RRs) from network meta-analysis in the lower triangle and the direct treatment estimates (RRs) from pairwise comparisons in the upper triangle.

Shaded Area = Direct Comparisons

**eTable 3c. Head-to-head comparisons of long-term safety of the included prophylactic treatments**

|                        | Amitriptylin        | Butterbur root extract | Cinnarizine         | Flunarizine          | Nimodipine          | Placebo             | Propranolol         | Riboflavin         | Sodium Valproate   | Topiramate        |
|------------------------|---------------------|------------------------|---------------------|----------------------|---------------------|---------------------|---------------------|--------------------|--------------------|-------------------|
| Amitriptylin           |                     |                        |                     |                      |                     | 3.50 [0.44; 27.91]  |                     |                    |                    | 0.88 [0.33; 2.37] |
| Butterbur root extract | 2.43 [0.04; 145.18] |                        |                     |                      |                     | 0.95 [0.02; 45.63]  |                     |                    |                    |                   |
| Cinnarizine            | 1.65 [0.02; 129.09] | 0.68 [0.00; 224.72]    |                     |                      |                     |                     | 1.00 [0.02; 49.59]  |                    |                    |                   |
| Flunarizine            | 0.33 [0.01; 8.07]   | 0.14 [0.00; 17.23]     | 0.20 [0.00; 36.62]  |                      |                     | 7.00 [0.38; 128.47] |                     |                    |                    |                   |
| Nimodipine             | 2.19 [0.04; 130.69] | 0.90 [0.00; 214.72]    | 1.33 [0.00; 438.70] | 6.64 [0.05; 840.10]  |                     | 1.05 [0.02; 50.43]  |                     |                    |                    |                   |
| Placebo                | 2.31 [0.61; 8.70]   | 0.95 [0.02; 45.63]     | 1.40 [0.02; 105.46] | 7.00 [0.38; 128.47]  | 1.05 [0.02; 50.43]  |                     |                     | 1.28 [0.03; 61.88] | 0.35 [0.05; 2.74]  | 0.43 [0.15; 1.24] |
| Propranolol            | 1.65 [0.24; 11.52]  | 0.68 [0.01; 49.65]     | 1.00 [0.02; 49.59]  | 5.00 [0.16; 157.52]  | 0.75 [0.01; 54.89]  | 0.71 [0.11; 4.56]   |                     |                    | 0.98 [0.06; 15.48] | 0.45 [0.07; 3.12] |
| Riboflavin             | 2.95 [0.05; 178.06] | 1.22 [0.01; 291.78]    | 1.79 [0.01; 595.87] | 8.95 [0.07; 1142.76] | 1.35 [0.01; 322.72] | 1.28 [0.03; 61.88]  | 1.79 [0.02; 131.92] |                    |                    |                   |
| Sodium Valproate       | 1.04 [0.13; 8.47]   | 0.43 [0.01; 30.30]     | 0.63 [0.01; 51.51]  | 3.16 [0.10; 95.30]   | 0.48 [0.01; 33.50]  | 0.45 [0.08; 2.65]   | 0.63 [0.08; 4.82]   | 0.35 [0.00; 25.10] |                    |                   |

**eTable 3c. Head-to-head comparisons of long-term safety of the included prophylactic treatments. Continued.**

|            | Amitriptylin      | Butterbur root extract | Cinnarizine        | Flunarizine        | Nimodipine         | Placebo           | Propranolol       | Riboflavin         | Sodium Valproate  | Topiramate |
|------------|-------------------|------------------------|--------------------|--------------------|--------------------|-------------------|-------------------|--------------------|-------------------|------------|
| Topiramate | 0.93 [0.35; 2.44] | 0.38 [0.01; 20.92]     | 0.56 [0.01; 39.73] | 2.81 [0.13; 61.39] | 0.42 [0.01; 23.12] | 0.40 [0.14; 1.12] | 0.56 [0.10; 3.08] | 0.31 [0.01; 17.33] | 0.89 [0.13; 5.96] |            |

Note: The league table contains the network estimates (RRs) from network meta-analysis in the lower triangle and the direct treatment estimates (RRs) from pairwise comparisons in the upper triangle. Shaded Area = Direct Comparisons

## eReferences.

1. IntHout J, Ioannidis JP, Rovers MM, Goeman JJ. Plea for routinely presenting prediction intervals in meta-analysis. *BMJ Open*. 2016;6(7):e010247.
2. Chaimani A, Salanti G. Using network meta-analysis to evaluate the existence of small-study effects in a network of interventions. *Res Synth Methods*. 2012;3(2):161-176.
3. Salanti G, Del Giovane C, Chaimani A, Caldwell DM, Higgins JP. Evaluating the quality of evidence from a network meta-analysis. *PLoS One*. 2014;9(7):e99682.
4. CINeMA: Confidence in Network Meta-Analysis [computer program]. Version 1.4.1. <http://cinema.ispm.ch/> 2017.
5. [https://handbook-5-1.cochrane.org/chapter\\_8/8\\_assessing\\_risk\\_of\\_bias\\_in\\_included\\_studies.htm](https://handbook-5-1.cochrane.org/chapter_8/8_assessing_risk_of_bias_in_included_studies.htm)
6. Cuijpers P, Noma H, Karyotaki E, Cipriani A, Furukawa TA. Effectiveness and acceptability of cognitive behavior therapy delivery formats in adults with depression: a network meta-analysis. *JAMA Psychiatry*. Published online April 17, 2019. doi:10.1001/jamapsychiatry.2019.0268
